1 **Title page**

2 **Prediction and Characterization of RXLR Effectors in *Pythium* Species**

3

4 Short title: **RXLR effectors in *Pythium* species**

5

6 Gan Ai<sup>1¶</sup>, Kun Yang<sup>1¶</sup>, Yuee Tian<sup>1,2</sup>, Wenwu Ye<sup>1</sup>, Hai Zhu<sup>1</sup>, Tianli Li<sup>1</sup>, Yaxin Du<sup>1</sup>,  
7 Qingyue Xia<sup>1</sup>, Danyu Shen<sup>1</sup>, Maofeng Jing<sup>1</sup>, Ai Xia<sup>1</sup>, Daolong Dou<sup>1\*</sup>

8

9 <sup>1</sup> College of Plant Protection, Nanjing Agricultural University, Nanjing 210095,  
10 China

11 <sup>2</sup> Department of Plant Protection, Henan University of Science and Technology,  
12 Luoyang 471000, China

13 \* Corresponding author: Daolong Dou, Email: [ddou@njau.edu.cn](mailto:ddou@njau.edu.cn)

14

15 Gan Ai, [2016102010@njau.edu.cn](mailto:2016102010@njau.edu.cn)

16 Kun Yang, [2019202016@njau.edu.cn](mailto:2019202016@njau.edu.cn)

17 Yuee Tian, [yueetian@haust.edu.cn](mailto:yueetian@haust.edu.cn)

18 Wenwu Ye, [yeww@njau.edu.cn](mailto:yeww@njau.edu.cn)

19 Hai Zhu, [2018102009@njau.edu.cn](mailto:2018102009@njau.edu.cn)

20 Tianli Li, [2018102007@njau.edu.cn](mailto:2018102007@njau.edu.cn)

21 Yaxin Du, [duyaxin1997@163.com](mailto:duyaxin1997@163.com)

22 Qingyue Xia, [2018802217@njau.edu.cn](mailto:2018802217@njau.edu.cn)

23 Danyu Shen, [shendanyu@njau.edu.cn](mailto:shendanyu@njau.edu.cn)

24 Maofeng Jing, [jingmf@njau.edu.cn](mailto:jingmf@njau.edu.cn)

25 Ai Xia, [xiaai@njau.edu.cn](mailto:xiaai@njau.edu.cn)

26 ¶These authors contributed equally to this work.

## 27 **Abstract**

28       Being widely existed in oomycetes, the RXLR effector features conserved  
29 RXLR-dEER motifs in its N terminal. Every known *Phytophthora* or  
30 *Hyaloperonospora* pathogen harbors hundreds of RXLRs. In *Pythium* species,  
31 however, none of the RXLR effectors has been characterized yet. Here, we developed  
32 a stringent method for *de novo* identification of RXLRs and characterized 359  
33 putative RXLR effectors from nine tested *Pythium* species. Phylogenetic analysis  
34 revealed a single superfamily formed by all oomycetous RXLRs, suggesting they  
35 descent from a common ancestor. RXLR effectors from *Pythium* and *Phytophthora*  
36 species exhibited similar sequence features, protein structures and genome locations.  
37 In particular, the mosquito biological agent *P. guiyangense* contains a significantly  
38 larger RXLR repertoire than the other eight *Pythium* species examined, which may  
39 result from gene duplication and genome rearrangement events as indicated by  
40 synteny analysis. Expression pattern analysis of RXLR-encoding genes in the plant  
41 pathogen *P. ultimum* detected transcripts from the vast majority of predicted *RXLRs*  
42 with some of them being induced at infection stages. One such *RXLRs* showed  
43 necrosis-inducing activity. Furthermore, all predicted *RXLRs* were cloned from two  
44 biocontrol agents *P. oligandrum* and *P. periplocum*. Three of them were found to  
45 encode effectors inducing defense response in *Nicotiana benthamiana*. Taken together,  
46 our findings represent the first complete synopsis of *Pythium* RXLR effectors, which  
47 provides critical clues on their evolutionary patterns as well as the mechanisms of  
48 their interactions with diverse hosts.

49 **Keywords: Oomycete; RXLR effector; gene evolution; *Pythium*; pathogenicity**

50

51 **Author summary**

52 Pathogens from the *Pythium* genus are widespread across multiple ecological  
53 niches. Most of them are soilborne plant pathogens whereas others cause infectious  
54 diseases in mammals. Some *Pythium* species can be used as biocontrol agents for  
55 plant diseases or mosquito management. Despite that phylogenetically close oomycete  
56 pathogens secrete RXLR effectors to enable infection, no RXLR protein was  
57 previously characterized in any *Pythium* species. Here we developed a stringent  
58 method to predict *Pythium* RXLR effectors and compared them with known RXLRs  
59 from other species. All oomycetous RXLRs form a huge superfamily, which indicates  
60 they may share a common ancestor. Our sequence analysis results suggest that the  
61 expansion of RXLR repertoire results from gene duplication and genome  
62 recombination events. We further demonstrated that most predicted *Pythium* RXLRs  
63 can be transcribed and some of them encode effectors exhibiting pathogenic or  
64 defense-inducing activities. This work expands our understanding of RXLR evolution  
65 in oomycetes in general, and provides novel insights into the molecular interactions  
66 between *Pythium* pathogens and their diverse hosts.

## 67 **Introduction**

68 Coevolution of microbial pathogens and host plants is driven by their endless  
69 arms race [1]. Plants respond to the conserved pathogen-associated molecular patterns  
70 (PAMPs) of pathogens via a diverse group of cell surface receptors, and thereby  
71 induce PAMP-triggered immunity (PTI) [2]. Numerous plant pathogens, including  
72 bacteria, nematodes, fungi and oomycetes, can counteract PTI by delivering effector  
73 proteins into host cells to suppress plant defense and facilitate infection [1,3].

74 RXLR proteins are a group of effectors initially identified from *Phytophthora*  
75 species. Their N terminals feature conserved RXLR-dEER motifs, which is assumed  
76 to function in the host cell translocation process. In contrast, the C-terminals of RXLR  
77 proteins are relatively divergent due to their distinct effector activities in modulating  
78 host immunity [4,5,6]. The interacting targets of some *Phytophthora* and  
79 *Hyaloperonospora* RXLRs have been well-studied. For example, the RXLR effector  
80 PexRD2 from *Phytophthora infestans* can perturb host resistance response by  
81 interacting with a positive plant immunity regulator MAPKKK [7]. PsAvh262, which  
82 is essential for the pathogenicity of *Phytophthora sojae*, suppresses ER  
83 stress-dependent immunity via stabilizing ER-luminal binding immunoglobulin  
84 proteins (BiPs) [8]. A *Phytophthora capsici* RXLR effector, PcRXLR207, triggers the  
85 degradation of BPA1 (Binding partner of ACD11) family proteins to facilitate the  
86 biotroph to necrotroph transition [9]. A conserved RXLR effector HaRxL23 from  
87 *Hyaloperonospora arabidopsidis* can suppress PTI in tobacco as well as  
88 effector-triggered immunity (ETI) in soybean [10]. Furthermore, some RXLRs are

89 avirulence proteins exhibiting gene-for-gene interactions with specific host resistance  
90 proteins [11].

91 Quantities of RXLR candidates have been identified from *Hyaloperonospora* and  
92 *Phytophthora* species via bioinformatic searching approaches. A pilot method was  
93 designed to search for protein with a signal peptide (SP) in its first 30 residues and an  
94 RXLR motif within the following 30 residues. This method was used for RXLR  
95 identification in *Hyaloperonospora parasitica*, *Phytophthora ramorum* and *P. sojae*  
96 [12]. Later on, RXLRs were identified in three *Phytophthora* species using the hidden  
97 Markov model (HMM) together with regular expression (regex) model [5]. A  
98 homology searching method was also developed and used together with HMM to  
99 predict 370 and 392 RXLRs in *P. ramorum* and *P. sojae*, respectively [13]. Moreover,  
100 the three approaches above were combined to characterize RXLRs in *Plasmopara*  
101 *viticola*, an oomycete pathogen infecting grapevine [14]. RXLR genes and proteins  
102 predicted from different species show similar features of diverse variation, disorder  
103 region enrichment and predominant localization in gene-sparse regions [13,15,16].  
104 Interestingly, there are also putative RXLRs found in *Albugo* and *Saprolegnia* species.  
105 For example, 26 Ac-RxL effectors were identified in *Albugo candida* by searching for  
106 the RXL string within proteins with SP. These Ac-RxLs exhibit effector activity  
107 despite that they only contain a degenerate RXLR motif [17]. In *Albugo laibachii*, 25  
108 RXLR and 24 RXLQ effector candidates were found using similar methods with two  
109 of them being functionally validated [18]. The fish-infecting oomycete *Saprolegnia*  
110 *parasitica* harbors an RXLR effector that enters the host cells to promote virulence

111 [19]. *Pythium* belongs to *Pythiales*, a sister order of *Peronosporales*, *Albuginales* and  
112 *Saprolegniales* [20]. All these RXL-containing oomycetes are phylogenetically close  
113 to *Pythium* species. Nevertheless, previously reported *Pythium* genome analyses did  
114 not reveal any RXLR-encoding genes [21,22,23,24].

115 Unlike *Phytophthora* species which are mostly plant-infecting pathogens,  
116 *Pythium* species occupy multiple ecological niches. Many *Pythium* species, including  
117 *P. ultimum*, *P. iwayamai*, and *P. aphanidermatum*, cause a wide variety of diseases in  
118 plants [21,22], whereas *P. insidiosum* is a notorious pathogen infecting human and  
119 animals [23]. Interestingly, Some *Pythium* species, such as *P. oligandrum* and *P.*  
120 *periplocum*, are used as mycoparasitic biocontrol agents since they can infect fungal  
121 hosts and induce plant defense response as well [25,26,27]. Likewise, *P. guiyangense*  
122 is a parasite used for mosquito control [24].

123 It is still unknown whether *Pythium* genomes encode RXLR effectors, or which  
124 kinds of effectors participate in the interactions between *Pythium* species and their  
125 broad hosts. To answer the questions above, we developed a stringent method for *de*  
126 *novo* identification of RXLRs in the draft genome sequences of 9 *Pythium* species and  
127 performed comprehensive genomic analysis on the RXLRs predicted. *Pythium*  
128 RXLRs form a single superfamily with all other known oomycetous RXLRs. All  
129 RXLR genes and proteins exhibit similar features in sequence divergence, disorder  
130 content and genome location. Four novel RXLRs from *P. ultimum*, *P. oligandrum* and  
131 *P. periplocum* were functionally verified as effectors. Our findings reveal the wide  
132 occurrence of RXLRs in *Pythium* species at the whole-genome level, demonstrate the

133 effector activities of selected *Pythium* RXLRs, and provide a solid platform for  
134 investigating the diversified roles of *Pythium* RXLRs in pathogenicity.

135

## 136 **Results**

### 137 ***De novo* identification of RXLR effectors**

138 No *Pythium* RXLR effector has been previously identified despite the numerous  
139 reports of RXLRs in their phylogenetically close species [21,22,23,24]. Here we  
140 developed a *de novo* identification method with stringent threshold to screen RXLR  
141 candidates in 9 *Pythium* species (Fig 1A). Meanwhile, well-studied *P. sojiae*, *P.*  
142 *ramorum* and *H. arabidopsidis* genomes were used as positive controls. Some other  
143 species including two diatoms were also parallelly examined (S1 Table, Fig 1B). For  
144 every gene, all 6 possible open reading frames (ORFs) were retrieved from each  
145 genome because almost all *RXLRs* lack intron [13]. Sequences were considered as  
146 sORFs (open reading frames encoding putative secretory protein) if their encoding  
147 proteins contain an SP but lack transmembrane region (TM).

148 In total, 311,164 sequences were achieved with 12,490 to 33,431 sORFs being  
149 found in each *Pythium* species, which is close to that of *Hyaloperonospora* and  
150 *Phytophthora* (12,830 to 25,178 sORFs). Interestingly, non-oomycetes only had 47 to  
151 12,213 sORFs identified (S1 Table). Significantly more sORFs can be found in  
152 oomycetes when compared to other species ( $P < 2.2E-16$ , Fisher's Exact Test),  
153 indicating the occurrence of more expansion events in secretory protein-encoding  
154 genes in oomycetes.

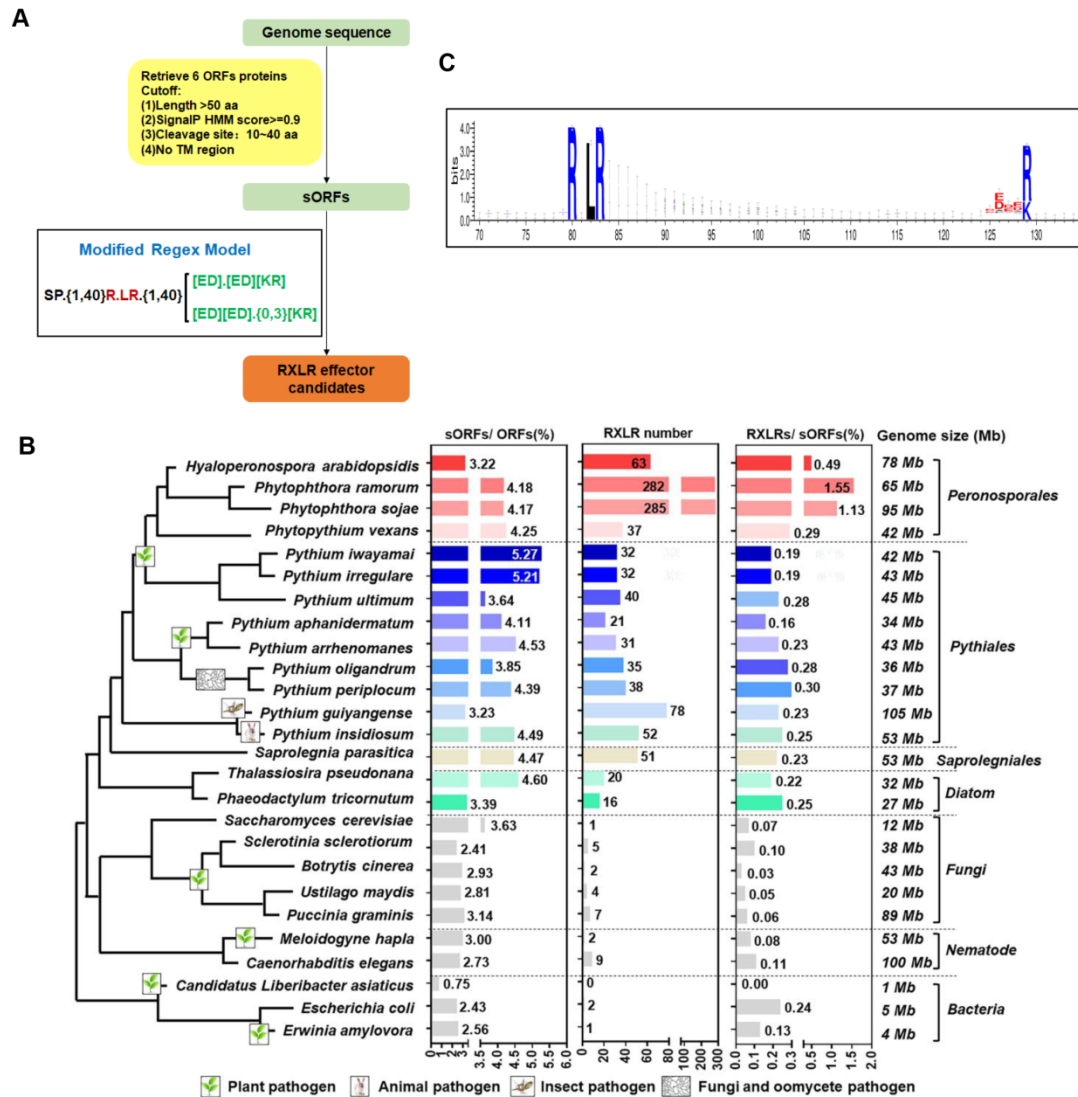

155  
 156 **Fig 1. De novo identification of RXLR effectors in *Pythium* species.** (A) The RXLR effector  
 157 identification pipeline. sORFs indicate open reading frames encoding secretory proteins with a  
 158 signal peptide (SP) but without transmembrane region (TM). (B) Summary of predicted RXLRs.  
 159 Phylogeny of the 26 species is based on data from the Taxonomy Database and previous studies.  
 160 The ratios of sORFs to whole ORFs, the counts of RXLR candidates and the ratios of RXLRs to  
 161 sORFs in each species are showed in boxplots following the species names. The genome size of  
 162 each species is showed after the corresponding boxplots. (C) Weblogo of the RXLR-dEER motifs  
 163 of *Pythium* RXLR effectors.

164 Since some functionally verified RXLR effectors contain degenerate dEER  
 165 motifs (S2 Table), the original regex model (SP.{1,96}R.LR.{1,40}([ED])([ED])([KR])  
 166 [5] was modified (SP.{1,40}R.LR.{1,40}([ED].[ED][KR])([ED][ED].[0,3][KR]) (Fig  
 167 1A) to allow the match of these atypical RXLRs. In total, 1,146 RXLR candidates  
 168 were identified using this modified model (Fig 1B).



169 We found 63, 282 and 285 RXLRs in *H. arabidopsidis*, *P. ramorum* and *P. sojae*,  
170 respectively. They are all subsets of previously identified RXLRs and account for  
171 42%, 53% and 42% of the total sets, respectively [5,12,13,28]. In contrast, only 0 to 9  
172 RXLRs were predicted in fungi, nematodes or bacteria. These control results  
173 demonstrate the high reliability as well as the low false-positive rate of our method.  
174 21 to 78 putative RXLRs were identified in each *Pythium* species. All predicted  
175 *Pythium* RXLR proteins contain a conserved SP, an RXLR motif and a dEER motif,  
176 in which two acidic amino acids (D or E) are enriched and followed by a conserved  
177 basic amino acid (R or K) (Fig 1C, S1 Fig).

178 To test the reliability of RXLR prediction in *Pythium*, an enrichment assay was  
179 conducted by comparing the number of RXLRs in each oomycete species with that of  
180 the fungal pathogen *Botrytis cinerea* (randomly selected as a control). All oomycetes  
181 including the *Pythium* species showed significant enrichment of RXLR sequences  
182 ( $P < 0.01$ , Fisher's Exact Test) (S3 Table). The enrichment was not observed in any of  
183 the non-*Stramenopiles* species ( $P > 0.05$ , Fisher's Exact Test). Next, a permutation test  
184 was performed to evaluate whether the predicted RXLR effectors are randomly  
185 occurred. We permuted the 90 after-SP residues of all sORFs and re-performed  
186 RXLR searching with the modified model for 100 times to estimate the false-positive  
187 rates. In general, very few RXLR predictions were generated from the permuted  
188 sequences, indicating that the vast majority of oomycete RXLRs were not predicted  
189 by chance (S4 Table). For example, 35 RXLRs were predicted in *P. oligandrum*  
190 whereas only 1 RXLR on average detected in its permuted sequences.

191 Besides their presence in all examined oomycetes including *Pythium* species,  
192 RXLR sequences can also be identified in diatoms (20 in *Thalassiosira pseudonana*  
193 and 16 in *Phaeodactylum tricornutum*) with significant enrichment ( $P < 0.01$ , Fisher's  
194 Exact Test). They may be the precursors of RXLR effectors that help diatoms  
195 compete with other organisms in the complicated environment.

196

### 197 **The evolutionary patterns of oomycete RXLRs**

198 Despite the highly divergence of RXLR proteins resulted from host-pathogen  
199 arms race, RXLR effectors from *P. sojae* and *P. ramorum* exhibit significant  
200 relatedness, suggesting that the hundreds of fast-evolving RXLRs in these two species  
201 may derive from a single common ancestor [13]. Therefore, we used the BLASTP  
202 software to analyze whether the predicted *Pythium* RXLRs belong to the same  
203 evolutionary theme. The highly similar SP regions were removed to avoid their  
204 interference. Using BLASTP hit  $E$ -value  $< 1$  as the cutoff, 840 RXLR proteins had  
205 significant hits to one or more other RXLRs. In total, 15,071 RXLR pairs were  
206 identified, which form a huge relatedness network (Fig 2A). *Phytophthora* RXLRs  
207 have a higher within-genus relatedness level when compared with those from *Pythium*  
208 or *Hyaloperonospora*, suggesting a larger contribution of recent gene expansion  
209 events in *Phytophthora*. We found three clusters sharing little relatedness with  
210 *Phytophthora* RXLRs, which indicates their relative independence in evolution.  
211 Almost all RXLRs in these clusters are from *Pythium*. The three clusters are named as  
212 Cluster 1 (C1), Cluster 2 (C2) and Cluster 3 (C3), respectively (Fig 2A). For example,

213 the average sequence identity of the 22  
214 RXLRs in C1 is 54%. A Peptidase\_S8  
215 domain (PF00082.22), which is absent in  
216 *Phytophthora*, can be found in the  
217 C-terminal of 21 C1 RXLRs.

218 **Fig 2. The evolutionary patterns of oomycetes**  
219 **RXLRs.** (A). The relatedness network of  
220 putative RXLR effectors. Each spot represents  
221 an RXLR. Similar RXLRs ( $E$ -value<1) are  
222 joined by edges. Spot colors indicate their  
223 genera. Three relatively independent clusters  
224 were marked as C1, C2 and C3, respectively.  
225 Almost all effectors in these clusters are from  
226 *Pythium*. Four RXLRs with effector activities  
227 verified in this study are labeled using arrows.  
228 (B) The maximum-likelihood phylogenetic tree  
229 of the RXLR-dEER motifs in RXLR effectors.

230 Grey, yellow and red circles in the nodes indicate bootstrap values of 0–50, 51–80 and 80–100,  
231 respectively. Leaves of the tree are colored base on the families of their indicated species.  
232

233 Conserved RXLRs may play critical effector roles in pathogen virulence [10].

234 Analysis of shared sequence identity (peptides with BLASTP hit  $E$ -value<1e-5 and  
235 identity>30%) revealed 67, 93 and 28 *Pythium* RXLRs being intraspecies, intragenus  
236 and intergenus conserved, respectively (S5 Table), suggesting that *Pythium* RXLRs  
237 share a common ancestor with those from other genera and were only slightly  
238 expanded after species divergence. These conserved RXLRs may be essential  
239 effectors for pathogens and deserve more attention in future study.

240 Phylogenetic analysis was performed to further elucidate the evolutionary  
241 relationships among oomycete RXLRs as well as RXLR-like proteins from diatoms.  
242 Due to the host-pathogen arms race, RXLR C-terminals (after the dEER motif) are

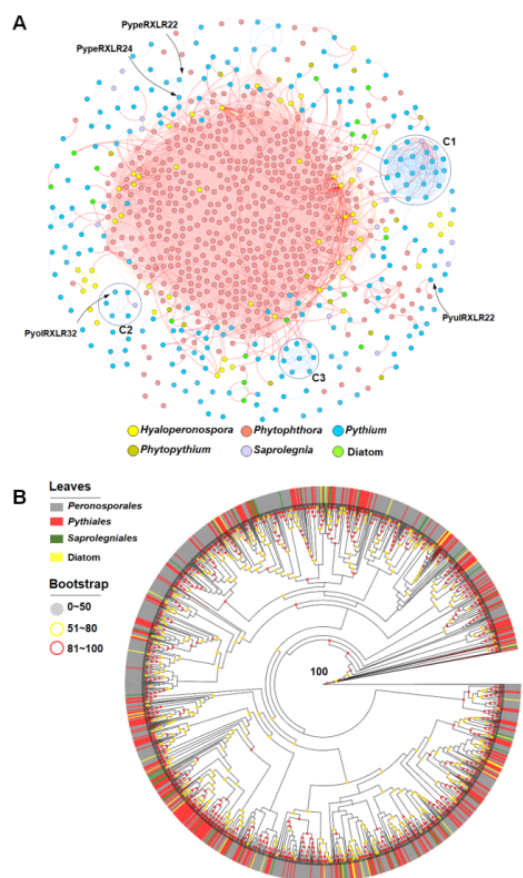

243 much more divergent [12] than their relatively conserved N-terminals [13,29].  
244 Therefore, when building the phylogenetic tree, C-terminal and SP regions were  
245 discarded to reflect RXLR evolution relatedness with minimal interferences from host  
246 coevolution and secretory signal sequences. Except for PyolRXLR33 and  
247 HyarRXLR1, all other 1,111 RXLRs formed a huge clade (bootstrap value=100),  
248 indicating that they belong to a single superfamily. Using bootstrap value>80 as the  
249 criteria, 972 RXLRs can be divided into 105 subfamilies with member sizes ranging  
250 from 2 to 112 (S6 Table). No significant divergence was detected among  
251 *Peronosporales*, *Pythiales*, *Saprolegniales* or diatom RXLRs (Fig 2B). 39 and 6  
252 subfamilies contain 119 and 28 RXLRs exclusively from *Peronosporales* and  
253 *Pythiales* species, respectively. All other subfamilies harbor RXLRs from at least two  
254 different genera. Taken together, the phylogeny results suggest a common ancestor  
255 shared by almost all RXLR and RXLR-like proteins with species-specific expansion  
256 much less detected in *Pythium* than in *Phytophthora*.

257

## 258 **Rapid evolution of *Pythium* RXLRs**

259 Highly divergent *Phytophthora* and *Hyaloperonospora* RXLRs are one of the  
260 most rapidly evolving portions in their proteomes [12,13]. Similarly, *Pythium* RXLRs  
261 also share low identities in our study. On average, only 37% identity was detected for  
262 all closest RXLR ortholog pairs within the *Pythium* genus. In contrast, we randomly  
263 selected 300 *Pythium* proteins and found a much higher average sequence identity  
264 (67%) associated with their closest ortholog pairs (Fig 3A). In our study, 233 (65%)

265 *Pythium* RXLRs failed to form any ortholog pairs whereas only 10 out of 300  
 266 randomly selected *Pythium* proteins lack orthologs (Fig 3A). Furthermore, 236 (66%)  
 267 *Pythium* RXLRs showed higher than 50% of sequence divergence (Fig 3A).

268

### 269 Disorder content is abundant in *Pythium* RXLRs

270 Disorder content is abundant in *Phytophthora* RXLRs which contributes to their  
 271 effector activities [16]. Our analysis demonstrated the abundance of disorder content  
 272 in *Pythium* RXLRs as well. The mean percentages of disorder region in randomly  
 273 selected *Pythium* proteins, *Pythium* RXLRs and *P. sojae* RXLRs are 27.17%, 45.48%  
 274 and 36.89%, respectively (Fig 3B). *Pythium* RXLRs shows obviously abundant  
 275 disorder content which is even higher than that of *P. sojae*. Over 64% *Pythium*  
 276 RXLRs have 30% or more disordered residues, which can be found in only 43.67%  
 277 randomly selected *Pythium* proteins (Fig 3B).

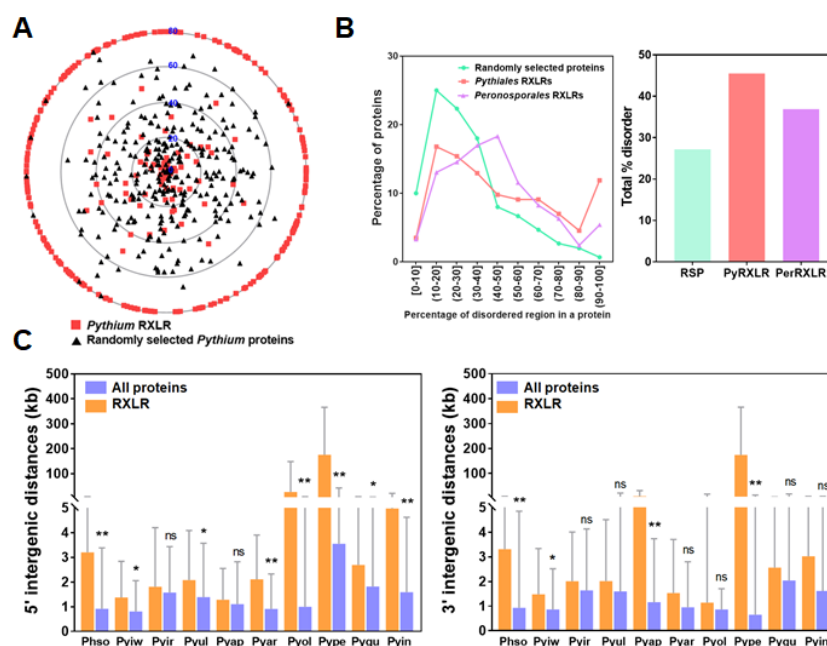

278

279 **Fig 3. Evolutionary features of *Pythium* RXLRs. (A) Sequence divergence of *Pythium***  
 280 **RXLRs. *Pythium* RXLRs were compared against 300 randomly selected *Pythium* proteins**

281 regarding the sequence identities of their closest ortholog pairs within the *Pythium* genus.  
282 Radiuses range from 0 (center) to 80 (outer circle) represent 100% to 20% (or less) sequence  
283 identities sequentially. Proteins at the same identity level are randomly distributed along their  
284 corresponding circle. **(B) Disorder content in *Peronosporales* and *Pythiales* RXLRs.** The line  
285 plot shows the percentages of proteins containing different percentages of disordered regions. The  
286 bar plot shows total disorder percentages in *Peronosporales*, *Pythiales* and randomly selected  
287 proteins. RSP, Randomly selected proteins; PyRXLR, *Pythiales* RXLRs; PerRXLR,  
288 *Peronosporales* RXLRs. **(C) 5' and 3' end intergenic distances of *P. sojae* and *Pythium* RXLRs.**  
289 The two bar plots show 5' (left) and 3' (right) end intergenic distances of indicated *RXLR* genes,  
290 respectively. (\*,  $P < 0.05$ ; \*\*,  $P < 0.001$ , Student's *t* test). Phso, *P. sojae*; Pyiw, *P. iwayamai*; Pyir, *P.*  
291 *irregulare*; Pyul, *P. ultimum*; Pyap, *P. aphanidermatum*; Pyar, *P. arrhenomanes*; Pyol, *P.*  
292 *oligandrum*; Pype, *P. periplocum*; Pygu, *P. guiyangense*; Pyin, *P. insidiosum*.  
293

### 294 ***Pythium* RXLRs are predominantly located in gene-sparse regions**

295 *Phytophthora* *RXLR* genes are preferably located in gene-sparse regions [15]. In  
296 *P. sojae*, both the 5' and the 3' end average intergenic distances of *RXLRs* are  
297 significantly longer than those of the complete *P. sojae* genes ( $P < 0.05$ , Student's *t*  
298 test). The mean 5' end intergenic distance of *RXLRs* is 3.20 kb with the  
299 whole-genome mean being 0.91 kb. *RXLRs*' average 3' end intergenic distance of  
300 3.31 kb is also much longer than that of the complete *P. sojae* genes (0.92 kb) (Fig  
301 3C). Both observations are similar to the previous report [15].

302 Similar gene location preference was detected for *Pythium* *RXLRs* in our study.  
303 Compared with the complete gene sets of their corresponding species, *RXLRs* of all 9  
304 examined *Pythium* species have longer average intergenic distances at both 5' and 3'  
305 ends (Fig 3C). For the 5' and the 3' end average intergenic distances, the differences  
306 are statistically significant ( $P < 0.05$ , Student's *t* test) in 7 and 3 *Pythium* species,  
307 respectively (Fig 3C). These results indicate that *Pythium* *RXLRs* are predominantly  
308 located in gene-sparse regions, which is similar to that of the *Phytophthora* *RXLRs*.

309

310 **Genome rearrangement contribute to the emergence of novel *RXLR***  
311 **genes in *P. guiyangense***

312 *P. guiyangense* has a larger *RXLR* repertoire than all other *Pythium* species  
313 examined (Fig 1B). Our previous synteny analysis showed that *P. guiyangense* has a  
314 hybrid genome derived from two distinct parental species, which leads to a nearly  
315 two-fold expansion of its predicted genes when compared with other *Pythium* species.  
316 Consequently, most homology gene pairs in *P. guiyangense* show high degrees of  
317 collinearity [24]. However, we only found 4 *RXLRs* from different scaffolds showing  
318 collinearity, indicating that additional mechanisms may also contribute to the  
319 expansion of *RXLR* genes in *P. guiyangense*. We noticed that 29 *PyguRXLRs* form  
320 several clusters (<40 kb in size) with each cluster located in the rearrangement region  
321 of a same contig. Similar phenomenon was not observed in other *Pythium* species (S2  
322 Fig). For example, *PyguRXLR6/7/8* (Fig 4A) and *PyguRXLR32/33/34* (Fig 4B) are  
323 clustered in the genome rearrangement regions in contigs 2 and 9, respectively.  
324 Furthermore, 22 clustered *RXLRs* show high similarities in N-terminals but have less  
325 conserved or even highly divergent C-terminals within each cluster. For example,  
326 *PyguRXLR6/7/8* share a conserved N-terminal but their C-terminals are highly  
327 divergent (Fig 4C). Similar pattern was observed in *PyguRXLR32/33* versus  
328 *PyguRXLR34* (Fig 4D). Taken together, these results suggest that both gene  
329 duplications and genome rearrangements contribute to the expansion and the  
330 emergence of novel *RXLRs* in *P. guiyangense*.



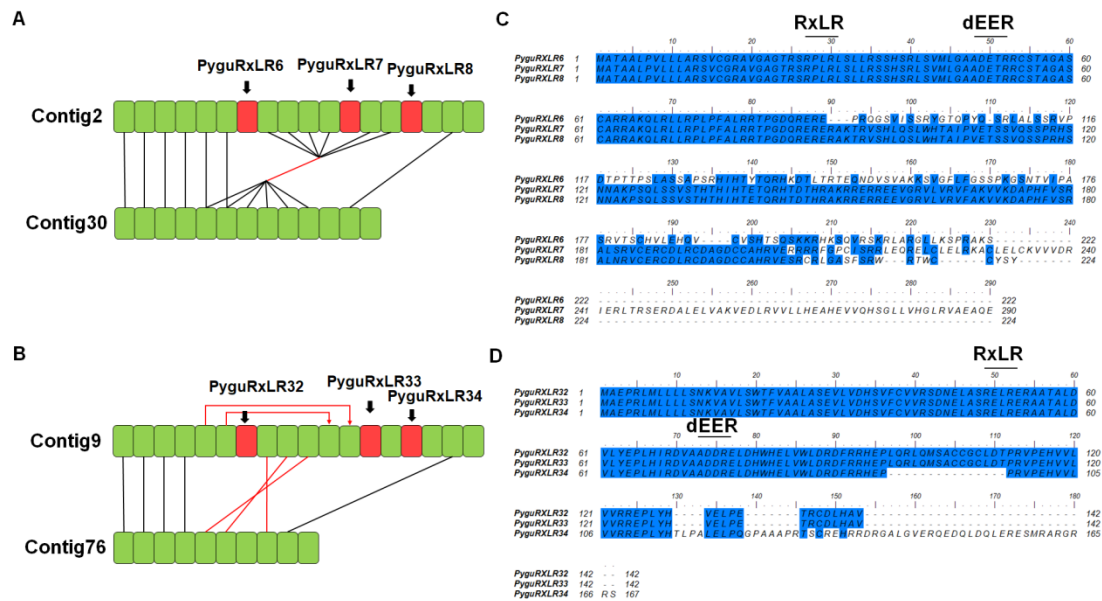

331

332 **Fig 4. Synteny analysis and protein sequence alignments of clustered RXLRs in *P.***  
 333 ***guiyangense*.** (A and B) Synteny analysis of clustered *P. guiyangense* RXLRs. Red blocks indicate  
 334 clustered *PyguRXLRs* described in the text. Green blocks indicate genes flanking to these  
 335 *PyguRXLRs*. Homologous genes with similar and opposite genome orientations are joined with  
 336 black and edges, respectively. (C and D) Protein sequence alignments of two RXLR clusters.  
 337 Identical or similar residues are colored in blue. The RXLR-dEER motifs are labeled in the  
 338 alignments.

339

### 340 **Most predicted *P. ultimum* RXLRs are truly transcribed genes**

341 To further elucidate whether these predicted *Pythium* RXLRs are truly transcribed  
 342 genes, an RNA-seq analysis was carried out to examine the transcript accumulations  
 343 of 40 RXLR candidates in *P. ultimum* during mycelium and 3, 6, 12, 24, 36 h post  
 344 host-infection stages. As one of the most important oomycetous plant pathogens with  
 345 a high-quality assembled genome sequence available [21,30], *P. ultimum* was selected  
 346 as the investigation target. Except for 2 candidates (PyulRXLR25/26) whose RPKM  
 347 (reads per kilobase transcript length per million reads mapped) values were  
 348 consistently below 1 at all stages, transcripts of the remaining 38 predicted RXLRs can  
 349 be detected at one or more stages (Fig 5A), suggesting that most *P. ultimum* RXLRs



350 predicted in our study are truly transcribed genes.

351 *P. ultimum* RXLR genes showed stage-specific expression patterns. They were  
352 assigned to four gene expression clusters (Fig 5A) via hierarchical clustering (HCL).  
353 Cluster 1 contains 2 putative pseudogenes and 5 RXLRs exhibiting zero to low  
354 expression. Despite their low transcript accumulations, all RXLRs in this cluster  
355 showed elevated expression during early infection stages. The 14 RXLRs in Cluster 2  
356 exhibited elevated transcript accumulations in both mycelium and late infection stages.  
357 The expression of 11 Cluster 3 RXLRs were largely constant across all the stages with  
358 slightly more transcripts detected at 3/6 hours post infection. The 8 Cluster 4 RXLRs  
359 showed a similar expression pattern as that of the RXLRs in Cluster 2 but with much  
360 higher RPKM values. These results revealed major transcription shifts of *PyulRXLRs*  
361 at mycelium and different host infection stages.

362

### 363 **PyulRXLR22 induces cell death in *Nicotiana benthamiana***

364 *Phytophthora* RXLRs suppress PAMP-induced plant cell death. Their ectopic  
365 expression can trigger cell death in plants [31]. To evaluate the effector activity of  
366 predicted *PyulRXLRs*, we selected 4 candidates (*PyulRXLR3/4/10/22*, 2 from Cluster  
367 1 and 2 from Cluster 4) for functional characterizations (Fig 5A). When co-expressed  
368 with *INF1* [32] in *N. benthamiana* leaves, none of these four RXLRs can suppress cell  
369 death triggered by the *P. infestans* PAMP INF1 (S3 Fig). When evaluating their  
370 ability to trigger host cell death by ectopic expression, only *PyulRXLR22* induced  
371 dramatic cell death in *N. benthamiana* leaves (Fig 5B). *PyulRXLR22* expression is

372 highly upregulated at late infection stages (Fig 5A). Fused with a GFP tag at  
 373 N-terminal, the four PyulRXLRs were transiently expressed in *N. benthamiana*  
 374 epidermal cells to reveal their subcellular localizations. PyulRXLR22 is located in  
 375 endoplasmic reticulum (ER), plasma membrane and the nucleus (Fig 5C). In contrast,  
 376 PyulRXLR3/4/10 were found in plasma membrane and the nucleus but not in ER (Fig  
 377 5C). Bioinformatic analysis showed that PyulRXLR22 has two homologs in *P.*  
 378 *ramorum* (BLASTP  $E$ -value<1) (Fig 2A). The demonstrated effector activity makes  
 379 PyulRXLR22 and its homologs promising targets for further investigation.

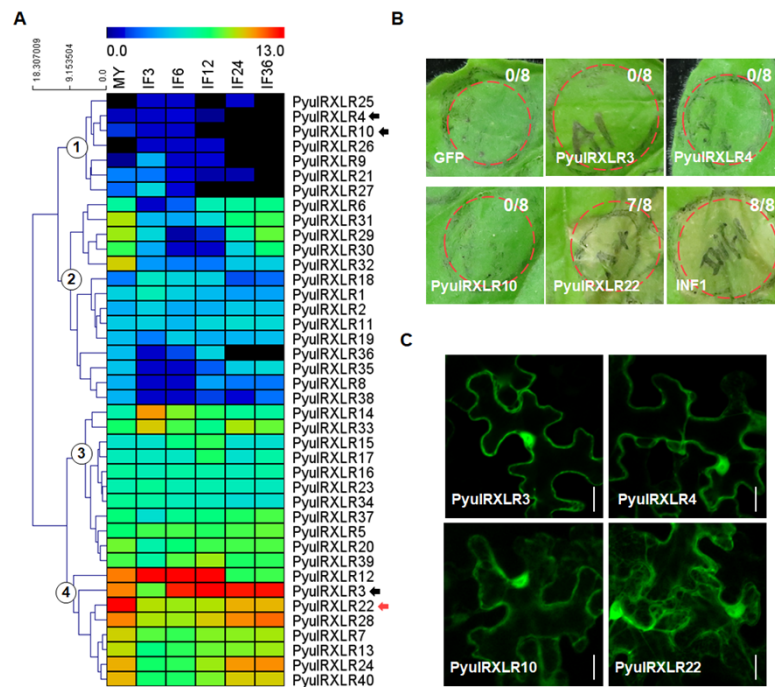

380  
 381 **Fig 5. Transcription patterns of *P. ultimum* RXLRs and the effector activity of PyulRXLR22.**  
 382 (A) Transcription patterns of *P. ultimum* RXLR candidates. The heat map shows gene transcription  
 383 patterns at the mycelia (MY) stage and stages of 3, 6, 12, 24 and 36 h post-inoculation of soybean  
 384 leaves. Color bars represent log<sub>2</sub> of gene RPKM values, ranging from dark blue (0) to red (13).  
 385 Black bars indicate no expression detected. RXLRs selected for the effector activity assay are  
 386 marked with arrows with red arrow indicating ability of inducing cell death in *N. benthamiana*.  
 387 Based on transcript accumulation levels and patterns, *P. ultimum* RXLRs are divided into 4 clusters  
 388 using HCL methods and the MeV software. Clusters are marked with circled numbers (1 to 4). (B)  
 389 PyulRXLR22 induced cell death in *N. benthamiana*. *N. benthamiana* leaves were transformed  
 390 with the indicated constructs by agro-infiltration. Dashed circles indicate infiltration sites and the  
 391 ratios are sites with necrotic lesion versus total infiltration sites. PyulRXLR3/4/10 did not induce

392 cell death. GFP and INF1 were used as negative and positive controls, respectively. (C)  
393 Subcellular localization of PyulRXLRs. Green fluorescence indicates the localizations of  
394 PyulRXLRs in *N. benthamiana* epidermal cells. Photographs were taken at 48 hpi. Bar =20  $\mu$ m.  
395

## 396 **RXLRs from biocontrol *Pythium* species induce plant defense in *N.*** 397 ***benthamiana***

398 *P. oligandrum* and *P. periplocum* are two unique *Pythium* species that are widely  
399 used for controlling soilborne plant diseases. They can infect pathogens and induce  
400 plant defense reactions as well [25,26,27]. To elucidate whether their RXLRs  
401 participate in this biocontrol process, all 73 RXLRs of these two species were cloned  
402 and expressed in *N. benthamiana* leaves individually to test their ability of triggering  
403 cell death. PyolRXLR32, PypeRXLR22 and PypeRXLR24 triggered cell death at 7  
404 days post infiltration (dpi) (Fig 6A). All other 70 RXLRs lack this ability.  
405 PyolRXLR32 is located in plasma membrane and the nucleus. Both PypeRXLR22  
406 and PypeRXLR24 are located in plasma and nuclear membranes (S4 Fig).

407

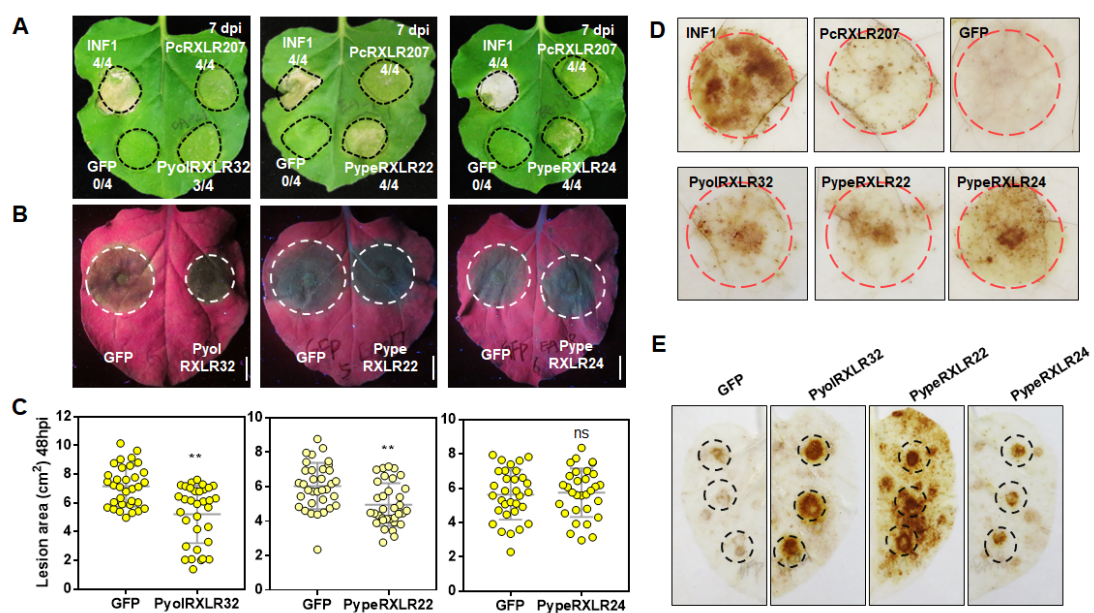

408

409 **Fig 6. RXLRs from *P. oligandrum* and *P. periplocum* induce plant defense response.** (A)  
410 Expression of PyolRXLR32, PypeRXLR22 or PypeRXLR24 induce cell death in *N. benthamiana*  
411 leaves. *N. benthamiana* leaves were transformed with the indicated constructs by agro-infiltration.  
412 Dashed circles indicate infiltration sites and the ratios are sites with necrotic lesion versus total  
413 infiltration sites. INF1 and the RXLR effector RXLR207 from *P. capsici* were used as positive  
414 controls. Empty vector expressing GFP was used as a negative control. Same controls were also  
415 used in the H<sub>2</sub>O<sub>2</sub> accumulation assay. (B and C) *P. capsici* infection can be reduced by  
416 PyolRXLR32 and PypeRXLR22, but not PypeRXLR24. 24 h after infiltration, equal amount of  
417 mycelium was inoculated onto each infiltrated area expressing *PyolRXLR32*, PypeRXLR22, or  
418 PypeRXLR24. Photographs were taken under UV light at 48 hpi and lesion areas were measured  
419 at the same time. Lesion area data shown in the dot plots were collected from three biological  
420 replicates. At least five leaves were inoculated for each replicate (\*\*,  $P < 0.001$ , Student's *t* test).  
421 Bar=1cm. (D) H<sub>2</sub>O<sub>2</sub> accumulation in *N. benthamiana* leaves expressing PyolRXLR32,  
422 PypeRXLR22 or PypeRXLR24. DAB staining was performed 48 hpi. Red dashed circles indicate  
423 infiltration sites. (E) H<sub>2</sub>O<sub>2</sub> accumulation in *P. capsica*-inoculated *N. benthamiana* leaves  
424 expressing PyolRXLR32, PypeRXLR22, or PypeRXLR24. *P. capsica* was inoculated 24 h after  
425 infiltration. DAB staining was performed at 12 hpi. Black dashed circles indicate inoculation sites.  
426

427 To investigate whether the three RXLR effectors can induce plant defense, we  
428 infiltrated *N. benthamiana* leaves with *Agrobacterium tumefaciens* harboring a *GFP*  
429 or indicated *RXLR* fusion construct and then inoculated the leaves with *P. capsici*.  
430 Compared with the GFP control, both PyolRXLR32 and PypeRXLR22 significantly  
431 reduced the lesion area caused by *P. capsici* whereas PypeRXLR24 did not have  
432 noticeable effect on lesion control (Fig 6B and 6C).

433 Reactive oxygen species (ROS) play a central role in plant immunity with ROS  
434 burst being a defense response indicator [33]. Our DAB staining assay showed that,  
435 compared with the GFP control, ectopic expression of any of the three RXLRs  
436 induced ROS burst in *N. benthamiana* leaves (Fig 6D). Furthermore, all three RXLRs  
437 can enhance ROS burst triggered by *P. capsici* inoculation (Fig 6E).

438 Interestingly, PyolRXLR32 is both intragenus and intergenus conserved (S5 Fig).  
439 Its *P. infestans* homolog (BLASTP  $E$ -value=2e-115), previously reported as SFI4

440 (Suppressor of early Flg22-induced Immune response 4), can inhibit host immunity  
441 and promote infection [34], which is opposite to PyolRXLR32's positive role in  
442 triggering cell death and defense response. Likewise, although PyeRXLR21/22/24  
443 share high sequence similarity (S6 Fig), PyolRXLR21 cannot trigger host cell death  
444 as PyolRXLR22/24 did. These results indicate that slight sequence difference may  
445 lead to diverse or even contrary functions of homologous RXLR effectors.

446

## 447 **Discussion**

448 In this study, we performed a *de novo* identification of RXLR effector genes from  
449 the genomes of nine *Pythium* species and analyzed their evolutionary features.  
450 Selected *Pythium* RXLR effectors were functionally verified. Despite the stringent  
451 prediction method we adopted, RXLRs can be found in a wide range of oomycetes  
452 including the *Pythium* species, and are almost absent outside *Stramenopiles*. Our  
453 phylogenetic analysis indicates the existence of a common ancestor for RXLRs with  
454 all oomycetous RXLRs clustered into a single superfamily. *Pythium* and  
455 *Phytophthora* RXLR genes share several similar features including rapid evolution,  
456 abundant disorder content and the preference of locating in gene-sparse regions. In  
457 particular, *P. guiyangense* harbors a much larger RXLR reservoir than other *Pythium*  
458 species due to frequent gene duplication and genome rearrangement events. Using *P.*  
459 *ultimum* as a model, most of its predicted RXLRs were demonstrated to be truly  
460 transcribed genes that cluster into four distinct expression patterns. The effector  
461 activity of PyulRXLRs22 was functionally verified in this study. Finally, we

462 identified three functional RXLR effectors from two biocontrol *Pythium* species.

463       Although no *Pythium* RXLRs has been identified before [21,22], there are clues  
464 indicating their existence. Several RXLR effectors have been experimentally  
465 validated in species phylogenetically close to *Pythium*, including *A. candida*, *A.*  
466 *laibachii* and *S. parasitica* [17][18] [19]. The necrotrophic infection type of *Pythium*  
467 pathogens also match the observations that many RXLR effectors can induce necrosis.  
468 Largely due to the stringent definition of the dEER motif, existing genome annotation  
469 models may be inadequate for *RXLR* gene prediction in *Pythium*. Hence, we  
470 developed a modified regex model to allow the search of degenerate dEER motifs.  
471 Previously reported effectors were adopted as references and all 6 possible ORFs  
472 were retrieved from the whole genomes. To reduce false-positive rates, we omitted  
473 the BLASTP step following RXLR searching. By adopting our modified regex model,  
474 we predicted 359 new RXLR proteins in nine *Pythium* species as well as  
475 re-identification of RXLRs from *H. arabidopsidis*, *P. ramorum* and *P. sojae*. The high  
476 accuracy of our new model is demonstrated by the observations that very few RXLRs  
477 was predicted outside *Stramenopiles* and all re-identified RXLRs are subsets of  
478 previously known RXLRs. Notably, our detection of RXLR-like proteins in diatoms  
479 suggests the origin of oomycetous RXLRs from an early ancestor of the  
480 *Stramenopiles* lineage. *Pythium* and other oomycetous RXLRs form a superfamily in  
481 our phylogenetic analysis, which also support the common-ancestor hypothesis of  
482 RXLR evolution.

483       Despite the high divergence of RXLR sequences, oomycetous RXLRs identified



484 in our study are close enough to form a huge relatedness network with *Phytophthora*  
485 RXLRs exhibiting higher overall sequence similarities. There are also RXLR clusters  
486 predominantly associated with *Pythium* or *Hyaloperonospora* species, suggesting the  
487 occurrence of independent evolution in these effectors.

488 *Phytophthora* and *Pythium* RXLRs share several common features. *Phytophthora*  
489 RXLR effectors promote virulence by manipulating host defense processes. Thus,  
490 they undergo rapid sequence evolution to escape the surveillance of plant immune  
491 system. In our study, this fast evolution pattern was also observed in *Pythium* RXLRs,  
492 which indicate their participation in host pathogenesis. As a consequence of effector  
493 evolution, abundant disorder regions exist in *Phytophthora* RXLRs [16]. These  
494 disorder regions are even more prevalent in *Pythium* RXLRs. *Phytophthora* genomes  
495 feature a so-called ‘two-speed’ structure of gene-dense and gene-sparse regions [35],  
496 with *RXLRs* enriched in the more dynamic gene-sparse regions. Gene-sparse regions  
497 are the hot sites of genome rearrangement and tend to accelerate pathogen evolution  
498 [36]. In *Pythium* species, we also found that both 5’ and 3’ end average intergenic  
499 distances of *RXLRs* are significantly longer than the whole genome averages, which  
500 demonstrates the similar location preference of *Pythium* *RXLRs* in the gene-sparse  
501 regions.

502 Due to their highly divergent C-terminals, few RXLR paralogs can be found in  
503 *Pythium* species except for *P. guiyangense*. We characterized the *P. guiyangense*  
504 genome as hybrid and identified a large set of *RXLR* genes. *P. guiyangense* *RXLRs*  
505 share low degrees of synteny with *PyguRXLR* paralogs often clustered in the same

506 contig and located in genome rearrangement regions. Furthermore, physically close  
507 paralog pairs generally share a conserved N-terminal but have less conserved or even  
508 highly divergent C-terminals. Our results indicate that recently happend gene  
509 duplication and genome rearrangement events shape the evolution theme of *P.*  
510 *guiyangense* *RXLRs*. Previous research suggests that the duplications of genes  
511 encoding virulence-associated effectors can facilitate pathogen adjustment towards a  
512 host jump [37]. In the case of *P. guiyangense*, the duplication and rearrangement  
513 events detected may generate novel *RXLR* genes which can help its adaption against  
514 insects. *RXLR* genes also clustered closely (<100kb) in *P. ramorum* [12], suggesting  
515 that *RXLR* gene cluster may be a common host adaptation strategy shared by  
516 oomycete species.

517 Our RNA-seq analysis on *P. ultimum* demonstrated that most predicted *RXLRs*  
518 are transcribed genes, which further verified the reliability of our redesigned *RXLR*  
519 annotation method. Meanwhile, these *RXLRs* exhibit distinct expression patterns  
520 during infection. *RXLR* expression stages are associated with their specific functions.  
521 In *P. sojae*, early-induced *RXLRs* inhibit host cell death triggered by PAMPs, while  
522 necrosis is caused by late-induced *RXLR* effectors [31]. Another *Phytophthora*  
523 pathogen, *P. capsici*, secretes a *RXLR* effector to induce host defense and cell death,  
524 and trigger the biotroph-to-necrotroph transition [9]. Since most *Pythium* pathogens  
525 are necrotrophic, their *RXLRs* may trigger host cell death instead of acting as cell  
526 death repressors. Consistent with this expectation, none of our tested *PyulRXLRs* can  
527 suppress host cell death induced by INF1. Instead, ectopic expression of



528 PyulRXLR22 triggers necrosis. The function diversity of RXLRs in *Phytophthora* and  
529 *Pythium* species may result from their different nutrient acquisition strategies during  
530 infection.

531 *P. oligandrum* and *P. periplocum* are two biocontrol agents with their  
532 defense-inducing mechanisms largely unknown. Previous reports suggest that plant  
533 defense may be induced by Microbe-Associated Molecular Patterns (MAMPs) from  
534 these two *Pythium* species [38]. In this study, we identified three RXLR effectors  
535 from them and demonstrated the plant defense induction ability of these RXLRs. This  
536 finding unveils the participation of cytoplasmic effectors in triggering host defense  
537 reactions. Since the *P. oligandrum* hyphae can penetrate into the root tissues, its  
538 RXLR effectors may be secreted to host cells via a similar mechanism detected in  
539 *Phytophthora* pathogens.

540 In conclusion, we for the first time identified RXLR effectors in *Pythium* species  
541 at the genome-wide scale. Their evolutionary features, sequence characteristics and  
542 expression patterns were analyzed in detail. The effector activities of selected *Pythium*  
543 RXLRs were experimentally verified, including their diversified functions in inducing  
544 cell death and host defense. This study expands our current understanding of  
545 oomycetous RXLR effectors to the *Pythium* genus. Resources generated in this work  
546 facilitate future in-depth investigations on the interactions between these novel  
547 *Pythium* RXLRs and their diversified hosts.

548

549

## 550 **Materials and methods**

### 551 **Data sets**

552 The genome sequences of *P. ramorum* and *P. sojae* [4] were obtained from the  
553 Joint Genome Institute website (<http://genome.jgi-psf.org>). The genome sequences of  
554 *H. arabidopsidis* [28], *Ph. vexans* [22], *P. aphanidermatum* [22], *P. arrhenomanes*  
555 [22], *P. irregulare* [22], *P. iwayamai* [22], *P. oligandrum* [39], *P. periplocum* [39], *P.*  
556 *ultimum* [21], *P. insidiosum* [23], *P. guiyangense* [24], *S. parasitica* [40], *P.*  
557 *tricornutum* [41], *T. pseudonana* [42], *S. cerevisiae* [43], *S. sclerotiorum* [44], *U.*  
558 *maydis* [45], *P. graminis* [46], *B. cinerea* [47], *C. elegans* [48], *M. hapla* [49], *E. coli*  
559 [50], *E. amylovora* [51] and *Ca L. asiaticus* [52] were obtained from the National  
560 Center for Biotechnology Information (NCBI, <https://www.ncbi.nlm.nih.gov/>).  
561 Detailed genomic information of all species is listed in S7 Table.

### 562 **Identification of RXLR effectors**

563 For RXLR effector identification, all open reading frames (ORFs) encoding  
564 proteins longer than 50 amino acids were retrieved. Signal peptides (SP) were  
565 predicted using SignalP v3 with the criteria that cleavage sites are located between  
566 residues 10 and 40 and HMM prob $\geq$ 0.9 [53]. Transmembrane regions (TMs) were  
567 predicted using TMHMM v2.0 [54]. Sequences containing SP but lacking TM were  
568 retained and screened for RXLRs with a modified regex model described as  
569 SP.{1,40}R.LR.{1,40}([ED].[ED]][KR]][ED][ED].{0,3}KR). All matched protein  
570 sequences were predicted as RXLR effectors. For redundant RXLRs caused by a set  
571 of alternative overlapping ORFs within the same reading frame, only the single ORF

572 encoding the longest RXLR was selected.

### 573 **Phylogenetic analysis**

574 For phylogenetic analysis, SPs and C-terminals after the dEER motif were  
575 removed from RXLR sequences. The truncated sequences were aligned using  
576 MUSCLE [55] and then manually edited. Maximum-likelihood (ML) trees were  
577 constructed using the IQ-TREE software with the parameter of -bb 1000 [56].  
578 VT+F+R6 was selected as the best-fit model for this assay by using the ModelFinder  
579 tool in IQ-TREE. The phylogenetic tree was showed using EvolView v3 [57].

### 580 **Disorder region prediction and synteny analysis**

581 Disorder region prediction was performed by using ESpritz  
582 (<http://protein.bio.unipd.it/espritz/>) with the X-ray prediction type and the best-sw  
583 threshold [58]. Synteny analysis was conducted using MCScanX [59].

### 584 **Vector construction**

585 For transient expression in *N. benthamiana*, *PyulRXLRs*, *PyolRXLRs* and  
586 *PypeRXLRs* (lacking the SP-encoding region) were amplified from their  
587 corresponding genomic DNA and inserted into the pBinGFP2 vector [60]. Primers  
588 used for PCR amplification are listed in S8 Table.

### 589 **Plant materials and agroinfiltration**

590 *N. benthamiana* plants were maintained in a greenhouse with an environmental  
591 temperature of 25°C under a 16-h/8-h light/dark photoperiod. The *A. tumefaciens*  
592 strain GV3101 was previously stored in our lab. Before infiltration, *A. tumefaciens*  
593 clones harboring indicated constructs were cultured at 28°C, 200 rpm for 48 h to reach

594 the appropriate concentration. The *Agrobacterium* cultures were then resuspended in  
595 10 mM MgCl<sub>2</sub> to an appropriate optical density (OD). For the necrosis induction  
596 assay, *A. tumefaciens* cells were infiltrated into the 6-week-old leaves of *N.*  
597 *benthamiana* at a final OD of 0.2 at 600 nm for each construct. For the cell death  
598 suppression assay, *A. tumefaciens* cells expressing the indicated RXLR effectors  
599 (OD<sub>600</sub>=0.3) were infiltrated into *N. benthamiana* leaves one day before the  
600 infiltration of *A. tumefaciens* expressing INF1 (OD<sub>600</sub>=0.2). Symptom development  
601 was examined 7 days after infiltration.

## 602 **Oomycete culture conditions and the inoculation assay**

603 The *P. oligandrum* strain CBS 530.74 and the *P. periplocum* strain CBS 532.74  
604 were kindly provided by Dr. Laura J. Grenville-Briggs at the Swedish University of  
605 Agricultural Sciences and were stored at 25 °C on 10% (v/v) V8 juice medium in the  
606 dark. *P. ultimum* and the *P. capsici* strain LT263 were previously stored in our lab and  
607 grown at 25 °C on the V8 medium in the dark. For *P. capsici* mycelium inoculation,  
608 7-mm disks of 4-day growth medium were inoculated on *N. benthamiana* leaves 24 h  
609 after infiltration. Inoculated leaves were photographed at 48 hpi under UV light.  
610 Lesion areas were measured at the indicated time points. This assay was  
611 independently repeated for at least three times. For the inoculation of *P. ultimum*,  
612 4-mm plugs from the growing edge of a 2-day V8 agar culture were placed in the *N.*  
613 *benthamiana* leaves, and the samples were harvested at the indicated time points.

## 614 **Transcriptome sequencing and bioinformatic analysis**

615 For mycelium samples, *P. ultimum* mycelium growing in V8 agar culture for 2

616 days were harvested. *P. ultimum* samples at different infection stages (3, 6, 12, 24, 36  
617 hpi) were harvested using a 5 cm punch. Three biological replicates were performed  
618 and used to produce an independent pool. The quality of total RNA was evaluated by  
619 Agilent 2100 Bioanalyzer (Agilent Technologies, Santa Clara, CA, USA). Samples  
620 with  $OD_{260/230} \geq 1.8$  and  $OD_{260/280} \geq 1.8$  were used for RNA-seq. Raw reads were  
621 filtered using the FastQC software  
622 (<https://www.bioinformatics.babraham.ac.uk/index.html>) to remove poor-quality  
623 reads and adapters. Sequences with a Phred score above 20 were considered as  
624 clean reads. All clean reads were mapped to the *P. ultimum* reference genome using  
625 Hisat2 with the parameters of --min-intronlen 30 --max-intronlen 5000 -dta [61].  
626 SAMtools was used to convert and sort SAM files [62]. Based on the lengths of each  
627 gene and the counts of uniquely mapped reads, gene expression levels were  
628 normalized as RPKM (reads per kilobase transcript length per million reads mapped)  
629 using the Stringtie tool [61]. Heat maps and clustering (using hierarchical clustering  
630 methods) of gene expression patterns were performed using the MeV software [63].

### 631 **DAB staining**

632 *N. benthamiana* leaves with ectopic expression of indicated RXLR effectors were  
633 detached at 48 hpi and then stained with 1 mg/ml DAB solution for 8 h in the dark.  
634 After destaining with ethanol, leaves were examined under light microscopy. *P.*  
635 *capsica*-inoculated *N. benthamiana* leaves were stained with 1 mg/ml DAB solution  
636 for 8 h in the dark at 12 hpi, and then destained with ethanol before photographing.

637  
638

## 639 References

640

- 641 1. Jones JD, Dangl JL. 2006. The plant immune system. *Nature*. 444(7117): 323-9.
- 642 2. Monaghan J, Zipfel C. 2012. Plant pattern recognition receptor complexes at the plasma  
643 membrane. *Curr Opin Plant Biol*. 15(4): 349-57.
- 644 3. Latijnhouwers M, de Wit PJ, Govers F. 2003. Oomycetes and fungi: similar weaponry to attack  
645 plants. *Trends Microbiol*. 11(10): 462-9.
- 646 4. Tyler BM, Tripathy S, Zhang X, et al. 2006. *Phytophthora* genome sequences uncover  
647 evolutionary origins and mechanisms of pathogenesis. *Science*. 313(5791): 1261-6.
- 648 5. Whisson SC, Boevink PC, Moleleki L, et al. 2007. A translocation signal for delivery of  
649 oomycete effector proteins into host plant cells. *Nature*. 450(7166): 115-8.
- 650 6. Dou D, Zhou JM. 2012. Phytopathogen effectors subverting host immunity: different foes,  
651 similar battleground. *Cell Host Microbe*. 12(4): 484-95.
- 652 7. King SR, McLellan H, Boevink PC, et al. 2014. *Phytophthora infestans* RXLR effector  
653 PexRD2 interacts with host MAPKKK  $\epsilon$  to suppress plant immune signaling. *Plant Cell*. 26(3):  
654 1345-59.
- 655 8. Jing M, Guo B, Li H, et al. 2016. A *Phytophthora sojae* effector suppresses endoplasmic  
656 reticulum stress-mediated immunity by stabilizing plant Binding immunoglobulin Proteins. *Nat*  
657 *Commun*. 7: 11685.
- 658 9. Li Q, Ai G, Shen D, et al. 2019. A *Phytophthora capsici* Effector Targets ACD11 Binding  
659 Partners that Regulate ROS-Mediated Defense Response in Arabidopsis. *Mol Plant*. 12(4):  
660 565-581.
- 661 10. Deb D, Anderson RG, How-Yew-Kin T, Tyler BM, McDowell JM. 2018. Conserved RxLR  
662 Effectors From Oomycetes *Hyaloperonospora arabidopsidis* and *Phytophthora sojae* Suppress  
663 PAMP- and Effector-Triggered Immunity in Diverse Plants. *Mol Plant Microbe Interact*. 31(3):  
664 374-385.
- 665 11. Anderson RG, Deb D, Fedkenheuer K, McDowell JM. 2015. Recent Progress in RXLR  
666 Effector Research. *Mol Plant Microbe Interact*. 28(10): 1063-72.
- 667 12. Win J, Morgan W, Bos J, et al. 2007. Adaptive evolution has targeted the C-terminal domain of  
668 the RXLR effectors of plant pathogenic oomycetes. *Plant Cell*. 19(8): 2349-69.
- 669 13. Jiang RH, Tripathy S, Govers F, Tyler BM. RXLR effector reservoir in two *Phytophthora*  
670 species is dominated by a single rapidly evolving superfamily with more than 700 members.  
671 *Proc Natl Acad Sci U S A*. 2008. 105(12): 4874-9.
- 672 14. Yin L, An Y, Qu J, Li X, Zhang Y, et al. (2017) Genome sequence of *Plasmopara viticola* and  
673 insight into the pathogenic mechanism. *Sci Rep* 7: 46553.
- 674 15. Haas BJ, Kamoun S, Zody MC, et al. Genome sequence and analysis of the Irish potato famine  
675 pathogen *Phytophthora infestans*. *Nature*. 2009. 461(7262): 393-8.
- 676 16. Shen D, Li Q, Sun P, Zhang M, Dou D. 2017. Intrinsic disorder is a common structural  
677 characteristic of RxLR effectors in oomycete pathogens. *Fungal Biol*. 121(11): 911-919.
- 678 17. Links MG, Holub E, Jiang RH, et al. 2011. De novo sequence assembly of *Albugo candida*  
679 reveals a small genome relative to other biotrophic oomycetes. *BMC Genomics*. 12: 503.
- 680 18. Kemen E, Gardiner A, Schultz-Larsen T, et al. 2011. Gene gain and loss during evolution of  
681 obligate parasitism in the white rust pathogen of *Arabidopsis thaliana*. *PLoS Biol*. 9(7):

- 682 e1001094.
- 683 19. Wawra S, Bain J, Durward E, et al. 2012. Host-targeting protein 1 (SpHtp1) from the oomycete  
684 *Saprolegnia parasitica* translocates specifically into fish cells in a  
685 tyrosine-O-sulphate-dependent manner. Proc Natl Acad Sci U S A. 109(6): 2096-101.
- 686 20. McCarthy C, Fitzpatrick DA. 2017. Phylogenomic Reconstruction of the Oomycete Phylogeny  
687 Derived from 37 Genomes. mSphere. 2(2).
- 688 21. Lévesque CA, Brouwer H, Cano L, et al. 2010. Genome sequence of the necrotrophic plant  
689 pathogen *Pythium ultimum* reveals original pathogenicity mechanisms and effector repertoire.  
690 Genome Biol. 11(7): R73.
- 691 22. Adhikari BN, Hamilton JP, Zerillo MM, Tisserat N, Lévesque CA, Buell CR. 2013.  
692 Comparative genomics reveals insight into virulence strategies of plant pathogenic oomycetes.  
693 PLoS One. 8(10): e75072.
- 694 23. Rujirawat T, Patumcharoenpol P, Lohnoo T, Yingyong W, Kumsang Y, et al. (2018) Probing  
695 the Phylogenomics and Putative Pathogenicity Genes of *Pythium insidiosum* by Oomycete  
696 Genome Analyses. Sci Rep 8: 4135.
- 697 24. Shen D, Tang Z, Wang C, et al. 2019. Infection mechanisms and putative effector repertoire of  
698 the mosquito pathogenic oomycete *Pythium guiyangense* uncovered by genomic analysis. PLoS  
699 Genet. 15(4): e1008116.
- 700 25. Benhamou N, Rey P, Chérif M, Hockenhull J, Tirilly Y. 1997. Treatment with the  
701 Mycoparasite *Pythium oligandrum* Triggers Induction of Defense-Related Reactions in Tomato  
702 Roots When Challenged with *Fusarium oxysporum* f. sp. radialis-lycopersici. Phytopathology.  
703 87(1): 108-22.
- 704 26. Paul B. 1999. *Pythium periplocum*, an aggressive mycoparasite of Botrytis cinerea causing the  
705 gray mould disease of grape-vine. FEMS Microbiol Lett. 181(2): 277-80.
- 706 27. Takenaka S, Nishio Z, Nakamura Y. 2003. Induction of Defense Reactions in Sugar Beet and  
707 Wheat by Treatment with Cell Wall Protein Fractions from the Mycoparasite *Pythium*  
708 *oligandrum*. Phytopathology. 93(10): 1228-32.
- 709 28. Baxter L, Tripathy S, Ishaque N, et al. 2010. Signatures of adaptation to obligate biotrophy in  
710 the *Hyaloperonospora arabidopsidis* genome. Science. 330(6010): 1549-1551.
- 711 29. Kale SD, Gu B, Capelluto DG, et al. 2010. External lipid PI3P mediates entry of eukaryotic  
712 pathogen effectors into plant and animal host cells. Cell. 142(2): 284-95.
- 713 30. Kamoun S, Furzer O, Jones JD, et al. 2015. The Top 10 oomycete pathogens in molecular plant  
714 pathology. Mol Plant Pathol. 16(4): 413-434.
- 715 31. Wang Q, Han C, Ferreira AO, et al. 2011. Transcriptional programming and functional  
716 interactions within the *Phytophthora sojae* RXLR effector repertoire. Plant Cell. 23(6):  
717 2064-86.
- 718 32. Kanneganti TD, Huitema E, Cakir C, Kamoun S. 2006. Synergistic interactions of the plant cell  
719 death pathways induced by *Phytophthora infestans* Nep1-like protein PiNPP1.1 and INF1  
720 elicitor. Mol Plant Microbe Interact. 19(8): 854-63.
- 721 33. Qi J, Wang J, Gong Z, Zhou JM. 2017. Apoplastic ROS signaling in plant immunity. Curr Opin  
722 Plant Biol. 38: 92-100.
- 723 34. Zheng X, McLellan H, Fraiture M, et al. 2014. Functionally redundant RXLR effectors from  
724 *Phytophthora infestans* act at different steps to suppress early flg22-triggered immunity. PLoS  
725 Pathog. 10(4): e1004057.



- 726 35. Raffaele S, Kamoun S. 2012. Genome evolution in filamentous plant pathogens: why bigger  
727 can be better. *Nat Rev Microbiol.* 10(6): 417-30.
- 728 36. Dong S, Raffaele S, Kamoun S. 2015. The two-speed genomes of filamentous pathogens: waltz  
729 with plants. *Curr Opin Genet Dev.* 35: 57-65.
- 730 37. Raffaele S, Farrer RA, Cano LM, et al. 2010. Genome evolution following host jumps in the  
731 Irish potato famine pathogen lineage. *Science.* 330(6010): 1540-3.
- 732 38. Benhamou N, le Floch G, Vallance J, Gerbore J, Grizard D, Rey P (2012) *Pythium oligandrum*:  
733 an example of opportunistic success. *Microbiology* 158: 2679-2694.
- 734 39. Kushwaha SK, Vetukuri RR, Grenville-Briggs LJ (2017) Draft Genome Sequence of the  
735 Mycoparasitic Oomycete *Pythium oligandrum* Strain CBS 530.74. *Genome Announc* 5 .
- 736 40. Jiang RH, de Bruijn I, Haas BJ, Belmonte R, Löbach L, et al. (2013) Distinctive expansion of  
737 potential virulence genes in the genome of the oomycete fish pathogen *Saprolegnia parasitica*.  
738 *PLoS Genet* 9: e1003272.
- 739 41. Bowler C, Allen AE, Badger JH, Grimwood J, Jabbari K, et al. (2008) The *Phaeodactylum*  
740 genome reveals the evolutionary history of diatom genomes. *Nature* 456: 239-244.
- 741 42. Armbrust EV, Berges JA, Bowler C, Green BR, Martinez D, et al. (2004) The genome of the  
742 diatom *Thalassiosira pseudonana*: ecology, evolution, and metabolism. *Science* 306: 79-86.
- 743 43. Jacq C, Alt-Mörbe J, Andre B, Arnold W, Bahr A, et al. (1997) The nucleotide sequence of  
744 *Saccharomyces cerevisiae* chromosome IV. *Nature* 387: 75-78.
- 745 44. Amselem J, Cuomo CA, van Kan JA, Viaud M, Benito EP, et al. (2011) Genomic analysis of  
746 the necrotrophic fungal pathogens *Sclerotinia sclerotiorum* and *Botrytis cinerea*. *PLoS Genet* 7:  
747 e1002230.
- 748 45. Kämper J, Kahmann R, Bölker M, Ma LJ, Brefort T, et al. (2006) Insights from the genome of  
749 the biotrophic fungal plant pathogen *Ustilago maydis*. *Nature* 444: 97-101.
- 750 46. Duplessis S, Cuomo CA, Lin YC, Aerts A, Tisserant E, et al. (2011) Obligate biotrophy  
751 features unraveled by the genomic analysis of rust fungi. *Proc Natl Acad Sci U S A* 108:  
752 9166-9171.
- 753 47. Van Kan JA, Stassen JH, Mosbach A, Van Der Lee TA, Faino L, et al. (2017) A gapless  
754 genome sequence of the fungus *Botrytis cinerea*. *Mol Plant Pathol* 18: 75-89.
- 755 48. *C. elegans* Sequencing Consortium (1998) Genome sequence of the nematode *C. elegans*: a  
756 platform for investigating biology. *Science* 282: 2012-2018.
- 757 49. Opperman CH, Bird DM, Williamson VM, Rokhsar DS, Burke M, et al. (2008) Sequence and  
758 genetic map of *Meloidogyne hapla*: A compact nematode genome for plant parasitism. *Proc*  
759 *Natl Acad Sci U S A* 105: 14802-14807.
- 760 50. Blattner FR, Plunkett G 3rd, Bloch CA, Perna NT, Burland V, et al. (1997) The complete  
761 genome sequence of *Escherichia coli* K-12. *Science* 277: 1453-1462.
- 762 51. Smits TH, Rezzonico F, Kamber T, Blom J, Goesmann A, et al. (2010) Complete genome  
763 sequence of the fire blight pathogen *Erwinia amylovora* CFBP 1430 and comparison to other  
764 *Erwinia* spp. *Mol Plant Microbe Interact* 23: 384-393.
- 765 52. Duan Y, Zhou L, Hall DG, Li W, Doddapaneni H, et al. (2009) Complete genome sequence of  
766 citrus huanglongbing bacterium, 'Candidatus Liberibacter asiaticus' obtained through  
767 metagenomics. *Mol Plant Microbe Interact* 22: 1011-1020.
- 768 53. Bendtsen JD, Nielsen H, von Heijne G, Brunak S. 2004. Improved prediction of signal peptides:  
769 SignalP 3.0. *J Mol Biol.* 340(4): 783-95.



- 770 54. Krogh A, Larsson B, von Heijne G, Sonnhammer EL. 2001. Predicting transmembrane protein  
771 topology with a hidden Markov model: application to complete genomes. *J Mol Biol.* 305(3):  
772 567-80.
- 773 55. Edgar RC. 2004. MUSCLE: a multiple sequence alignment method with reduced time and  
774 space complexity. *BMC Bioinformatics.* 5: 113.
- 775 56. Nguyen LT, Schmidt HA, von Haeseler A, Minh BQ. 2015. IQ-TREE: a fast and effective  
776 stochastic algorithm for estimating maximum-likelihood phylogenies. *Mol Biol Evol.* 32(1):  
777 268-74.
- 778 57. Subramanian B, Gao S, Lercher MJ, Hu S, Chen WH (2019) Evolview v3: a webserver for  
779 visualization, annotation, and management of phylogenetic trees. *Nucleic Acids Res* 47:  
780 W270-270W275.
- 781 58. Walsh I, Martin AJ, Di Domenico T, Tosatto SC (2012) ESpritz: accurate and fast prediction of  
782 protein disorder. *Bioinformatics* 28: 503-509.
- 783 59. Wang Y, Tang H, Debarry JD, et al. 2012. MCScanX: a toolkit for detection and evolutionary  
784 analysis of gene synteny and collinearity. *Nucleic Acids Res.* 40(7): e49.
- 785 60. Song T, Ma Z, Shen D, Li Q, Li W, et al. (2015) An Oomycete CRN Effector Reprograms  
786 Expression of Plant *HSP* Genes by Targeting their Promoters. *PLoS Pathog* 11: e1005348.
- 787 61. Pertea M, Kim D, Pertea GM, Leek JT, Salzberg SL (2016) Transcript-level expression analysis  
788 of RNA-seq experiments with HISAT, StringTie and Ballgown. *Nat Protoc* 11: 1650-1667.
- 789 62. Li H, Handsaker B, Wysoker A, Fennell T, Ruan J, et al. (2009) The Sequence Alignment/Map  
790 format and SAMtools. *Bioinformatics* 25: 2078-2079.
- 791 63. Saeed AI, Sharov V, White J, et al. 2003. TM4: a free, open-source system for microarray data  
792 management and analysis. *Biotechniques.* 34(2): 374-8.

## 795 **Figure Legends**

796 **Fig 1. *De novo* identification of RXLR effectors in *Pythium* species.** (A) The  
797 RXLR effector identification pipeline. sORFs indicate open reading frames encoding  
798 secretory proteins with a signal peptide (SP) but without transmembrane region (TM).  
799 (B) Summary of predicted RXLRs. Phylogeny of the 26 species is based on data from  
800 the Taxonomy Database and previous studies. The ratios of sORFs to whole ORFs,  
801 the counts of RXLR candidates and the ratios of RXLRs to sORFs in each species are  
802 showed in boxplots following the species names. The genome size of each species is  
803 showed after the corresponding boxplots. (C) Weblogo of the RXLR-dEER motifs of  
804 *Pythium* RXLR effectors.

805  
806 **Fig 2. The evolutionary patterns of oomycetes RXLRs.** (A). The relatedness  
807 network of putative RXLR effectors. Each spot represents an RXLR. Similar RXLRs

808 ( $E$ -value<1) are joined by edges. Spot colors indicate their genera. Three relatively  
809 independent clusters were marked as C1, C2 and C3, respectively. Almost all  
810 effectors in these clusters are from *Pythium*. Four RXLRs with effector activities  
811 verified in this study are labeled using arrows. (B) The maximum-likelihood  
812 phylogenetic tree of the RXLR-dEER motifs in RXLR effectors. Grey, yellow and red  
813 circles in the nodes indicate bootstrap values of 0–50, 51–80 and 80–100, respectively.  
814 Leaves of the tree are colored base on the families of their indicated species.

815

816 **Fig 3. Evolutionary features of *Pythium* RXLRs. (A) Sequence divergence of**  
817 ***Pythium* RXLRs.** *Pythium* RXLRs were compared against 300 randomly selected  
818 *Pythium* proteins regarding the sequence identities of their closest ortholog pairs  
819 within the *Pythium* genus. Radiuses range from 0 (center) to 80 (outer circle)  
820 represent 100% to 20% (or less) sequence identities sequentially. Proteins at the same  
821 identity level are randomly distributed along their corresponding circle. **(B) Disorder**  
822 **content in *Peronosporales* and *Pythiales* RXLRs.** The line plot shows the  
823 percentages of proteins containing different percentages of disordered regions. The  
824 bar plot shows total disorder percentages in *Peronosporales*, *Pythiales* and randomly  
825 selected proteins. RSP, Randomly selected proteins; PyRXLR, *Pythiales* RXLRs;  
826 PerRXLR, *Peronosporales* RXLRs. **(C) 5' and 3' end intergenic distances of *P.***  
827 ***sojae* and *Pythium* RXLRs.** The two bar plots show 5' (left) and 3' (right) end  
828 intergenic distances of indicated *RXLR* genes, respectively. (\*,  $P$ <0.05; \*\*,  $P$ <0.001,  
829 Student's  $t$  test). Phso, *P. sojae*; Pyiw, *P. iwayamai*; Pyir, *P. irregulare*; Pyul, *P.*  
830 *ultimum*; Pyap, *P. aphanidermatum*; Pyar, *P. arrhenomanes*; Pyol, *P. oligandrum*;  
831 Pype, *P. periplocum*; Pygu, *P. guiyangense*; Pyin, *P. insidiosum*.

832

833 **Fig 4. Synteny analysis and protein sequence alignments of clustered RXLRs in *P.***  
834 ***guiyangense*.** (A and B) Synteny analysis of clustered *P. guiyangense* *RXLRs*. Red  
835 blocks indicate clustered *PyguRXLRs* described in the text. Green blocks indicate  
836 genes flanking to these *PyguRXLRs*. Homologous genes with similar and opposite  
837 genome orientations are joined with black and edges, respectively. (C and D) Protein

838 sequence alignments of two RXLR clusters. Identical or similar residues are colored  
839 in blue. The RXLR-dEER motifs are labeled in the alignments.

840

841 **Fig 5. Transcription patterns of *P. ultimum* RXLRs and the effector activity of**  
842 **PyulRXLR22.** (A) Transcription patterns of *P. ultimum* RXLR candidates. The heat  
843 map shows gene transcription patterns at the mycelia (MY) stage and stages of 3, 6,  
844 12, 24 and 36 h post-inoculation of soybean leaves. Color bars represent log<sub>2</sub> of gene  
845 RPKM values, ranging from dark blue (0) to red (13). Black bars indicate no  
846 expression detected. RXLRs selected for the effector activity assay are marked with  
847 arrows with red arrow indicating ability of inducing cell death in *N. benthamiana*.  
848 Based on transcript accumulation levels and patterns, *P. ultimum* RXLRs are divided  
849 into 4 clusters using HCL methods and the MeV software. Clusters are marked with  
850 circled numbers (1 to 4). (B) PyulRXLR22 induced cell death in *N. benthamiana*. *N.*  
851 *benthamiana* leaves were transformed with the indicated constructs by  
852 agro-infiltration. Dashed circles indicate infiltration sites and the ratios are sites with  
853 necrotic lesion versus total infiltration sites. PyulRXLR3/4/10 did not induce cell  
854 death. GFP and INF1 were used as negative and positive controls, respectively. (C)  
855 Subcellular localization of PyulRXLRs. Green fluorescence indicates the localizations  
856 of PyulRXLRs in *N. benthamiana* epidermal cells. Photographs were taken at 48 hpi.  
857 Bar =20 μm.

858

859 **Fig 6. RXLRs from *P. oligandrum* and *P. periplocum* induce plant defense**  
860 **response.** (A) Expression of PyolRXLR32, PyperRXLR22 or PyperRXLR24 induce  
861 cell death in *N. benthamiana* leaves. *N. benthamiana* leaves were transformed with  
862 the indicated constructs by agro-infiltration. Dashed circles indicate infiltration sites  
863 and the ratios are sites with necrotic lesion versus total infiltration sites. INF1 and the  
864 RXLR effector RXLR207 from *P. capsici* were used as positive controls. Empty  
865 vector expressing GFP was used as a negative control. Same controls were also used  
866 in the H<sub>2</sub>O<sub>2</sub> accumulation assay. (B and C) *P. capsici* infection can be reduced by  
867 PyolRXLR32 and PyperRXLR22, but not PyperRXLR24. 24 h after infiltration, equal

868 amount of mycelium was inoculated onto each infiltrated area expressing  
869 *PyolRXLR32*, *PypeRXLR22*, or *PypeRXLR24*. Photographs were taken under UV  
870 light at 48 hpi and lesion areas were measured at the same time. Lesion area data  
871 shown in the dot plots were collected from three biological replicates. At least five  
872 leaves were inoculated for each replicate (\*\*,  $P < 0.001$ , Student's *t* test). Bar=1 cm. (D)  
873  $H_2O_2$  accumulation in *N. benthamiana* leaves expressing *PyolRXLR32*, *PypeRXLR22*  
874 or *PypeRXLR24*. DAB staining was performed 48 hpi. Red dashed circles indicate  
875 infiltration sites. (E)  $H_2O_2$  accumulation in *P. capsica*-inoculated *N. benthamiana*  
876 leaves expressing *PyolRXLR32*, *PypeRXLR22*, or *PypeRXLR24*. *P. capsica* was  
877 inoculated 24 h after infiltration. DAB staining was performed at 12 hpi. Black  
878 dashed circles indicate inoculation sites.

879

## 880 **Supporting information**

881 **S1 Fig. Sequence alignment of *Pythium* RXLRs.** Signal peptide and the  
882 RXLR-dEER motifs are labeled above their corresponding regions. Arg and Lys  
883 residues in the RXLR-dEER motifs are colored in blue. Glu and Asp residues are  
884 colored in red.

885 **S2 Fig. Numbers of clustered RXLR effectors in each species.** RXLR pairs with  
886 distances less than 40 kb in the same scaffold are showed. Hyar, *H. arabidopsidis*;  
887 Phra, *P. ramorum*; Phso, *P. sojae*; Phve, *P. vexans*; Pyiw, *P. iwayamai*; Pyir, *P.*  
888 *irregulare*; Pyul, *P. ultimum*; Pyap, *P. aphanidermatum*; Pyar, *P. arrhenomanes*; Pyol,  
889 *P. oligandrum*; Pype, *P. periplocum*; Pygu, *P. guiyangense*; Pyin, *P. insidiosum*; Sapa,  
890 *S. parasitica*; Thps, *T. pseudonana*; Phtr, *P. tricornutum*.

891 **S3 Fig. PyulRXLRs do not inhibit cell death triggered by INF1.** *A. tumefaciens*  
892 harboring indicated constructs were infiltrated into *N. benthamiana* leaves 24 h before

893 the infiltrations of INF1. Photos were taken 4 days after infiltration.

894 **S4 Fig. Subcellular localization of PyolRXLR32, PypeRXLR22 and PyolRXLR24.**

895 Indicated constructs were expressed in *N. benthamiana* epidermal cells to show  
896 protein localizations. Images were taken at 48 hpi. Bar=20µm.

897 **S5 Fig. Sequence alignment of PyolRXLR32 and its homologs.** The RXLR-dEER  
898 motifs were labeled above their corresponding regions.

899 **S6 Fig. Sequence alignment of PyolRXLR21, 22 and 24.** The RXLR-dEER motifs  
900 were labeled above their corresponding sites.

901

902 **S1 Table.** Overall counts of predicted RXLR effectors per species.

903 **S2 Table.** Known functional RXLR with degenerate dEER motif

904 **S3 Table.** Enrichment assay result comparing *B. cinerea* to the other species

905 **S4 Table.** Permutation test of RXLR motif in each species

906 **S5 Table.** Conserved RXLR effectors

907 **S6 Table.** RXLRs summary

908 **S7 Table.** Genomic information used in this study

909 **S8 Table.** Primers used in this study

910 **S9 Table.** RPKM value of *PyRXLRs* during different stages



A

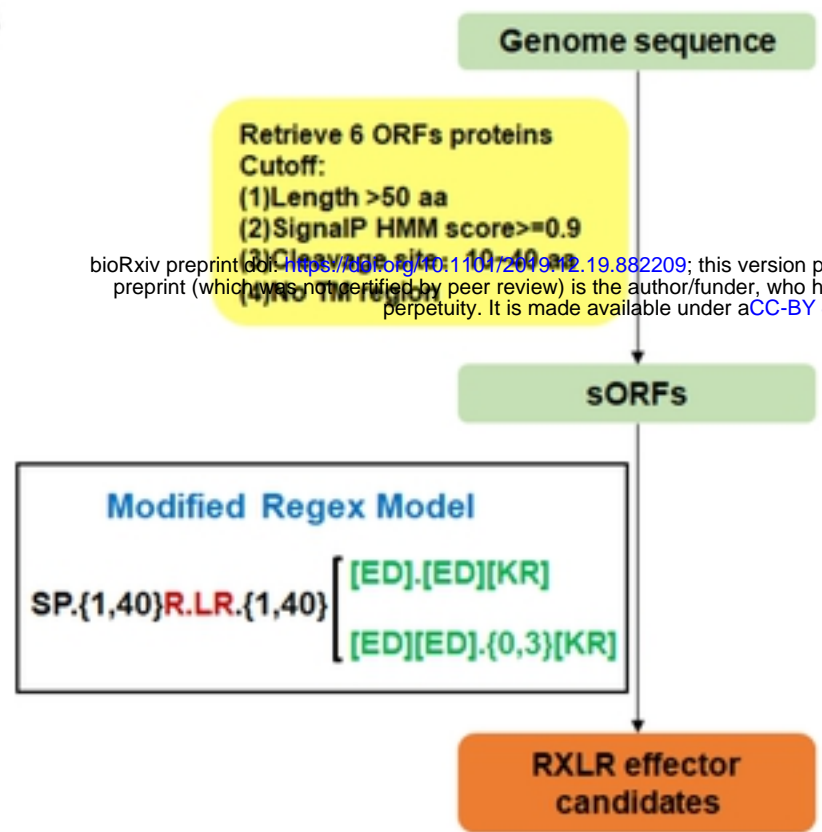

bioRxiv preprint doi: <https://doi.org/10.1101/2019.12.19.882209>; this version posted December 19, 2019. The copyright holder for this preprint (which was not certified by peer review) is the author/funder, who has granted bioRxiv a license to display the preprint in perpetuity. It is made available under aCC-BY 4.0 International license.

C

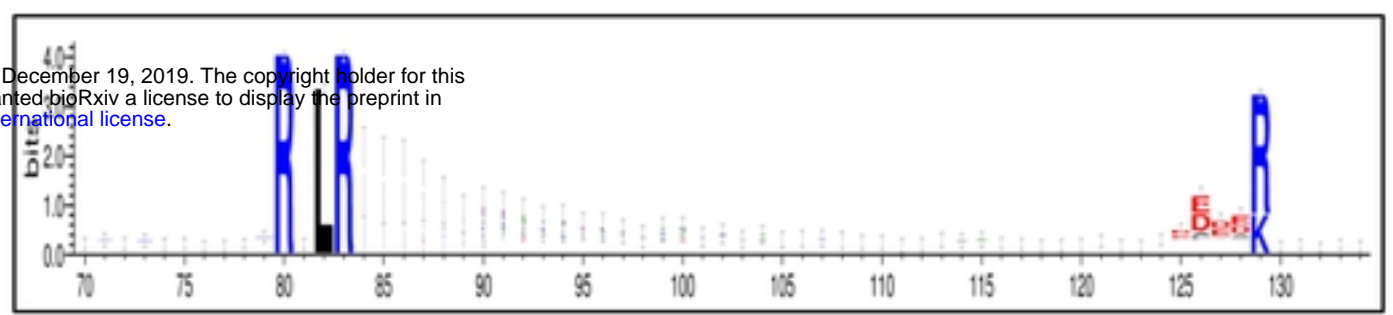

B

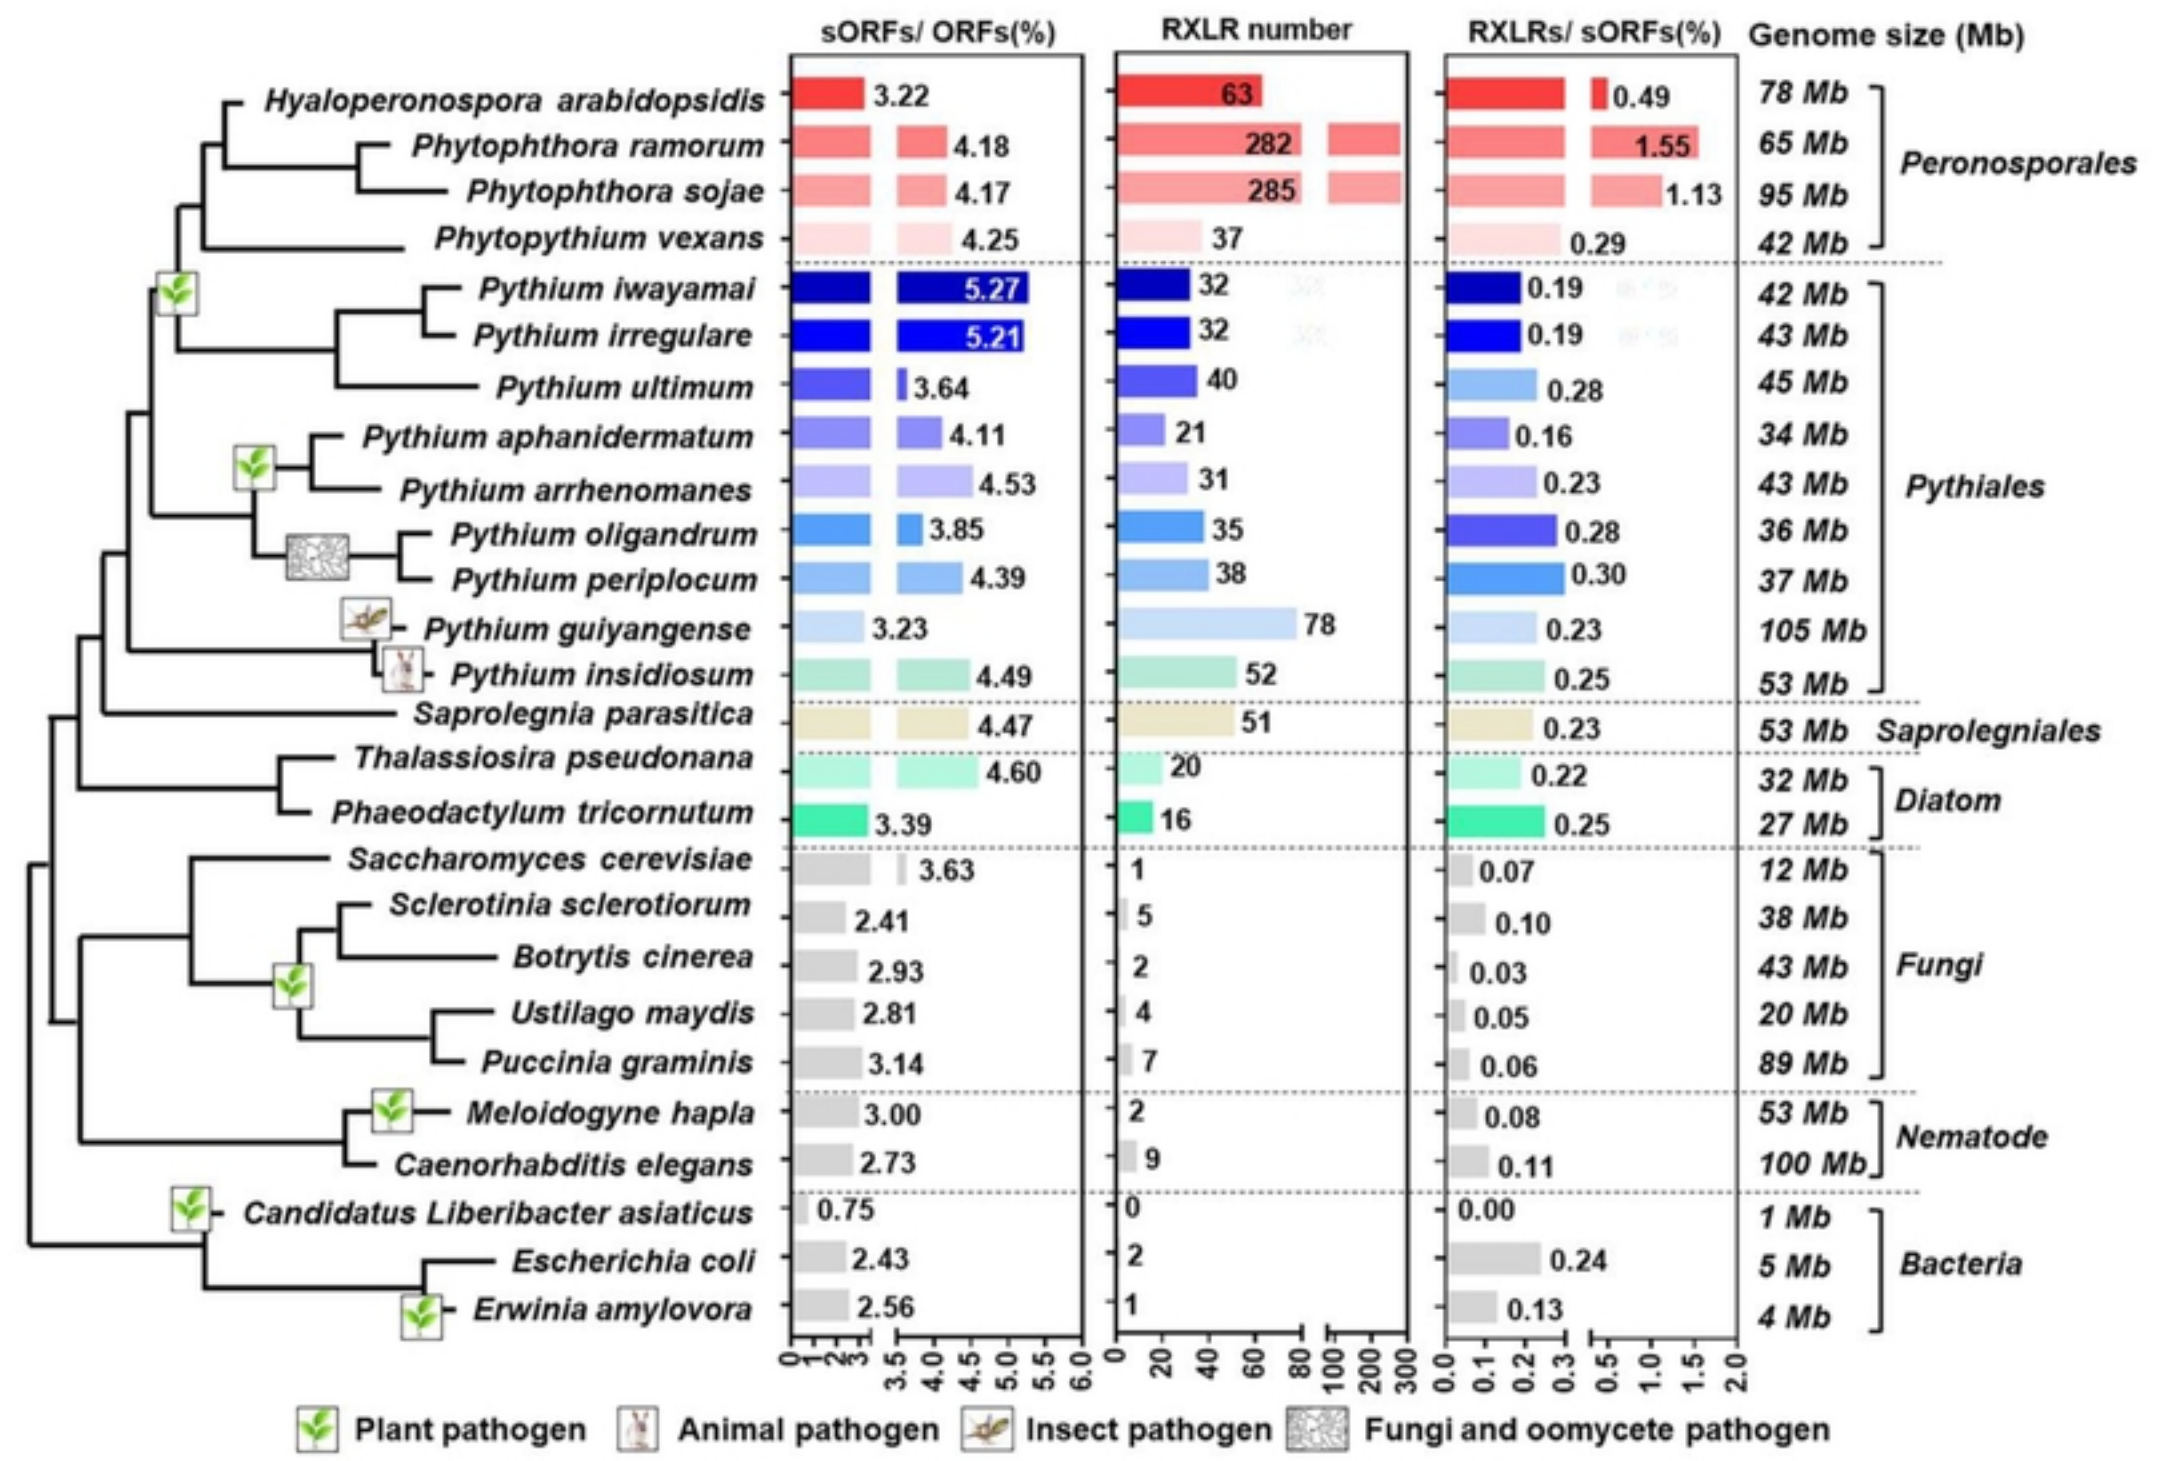

Figure 1



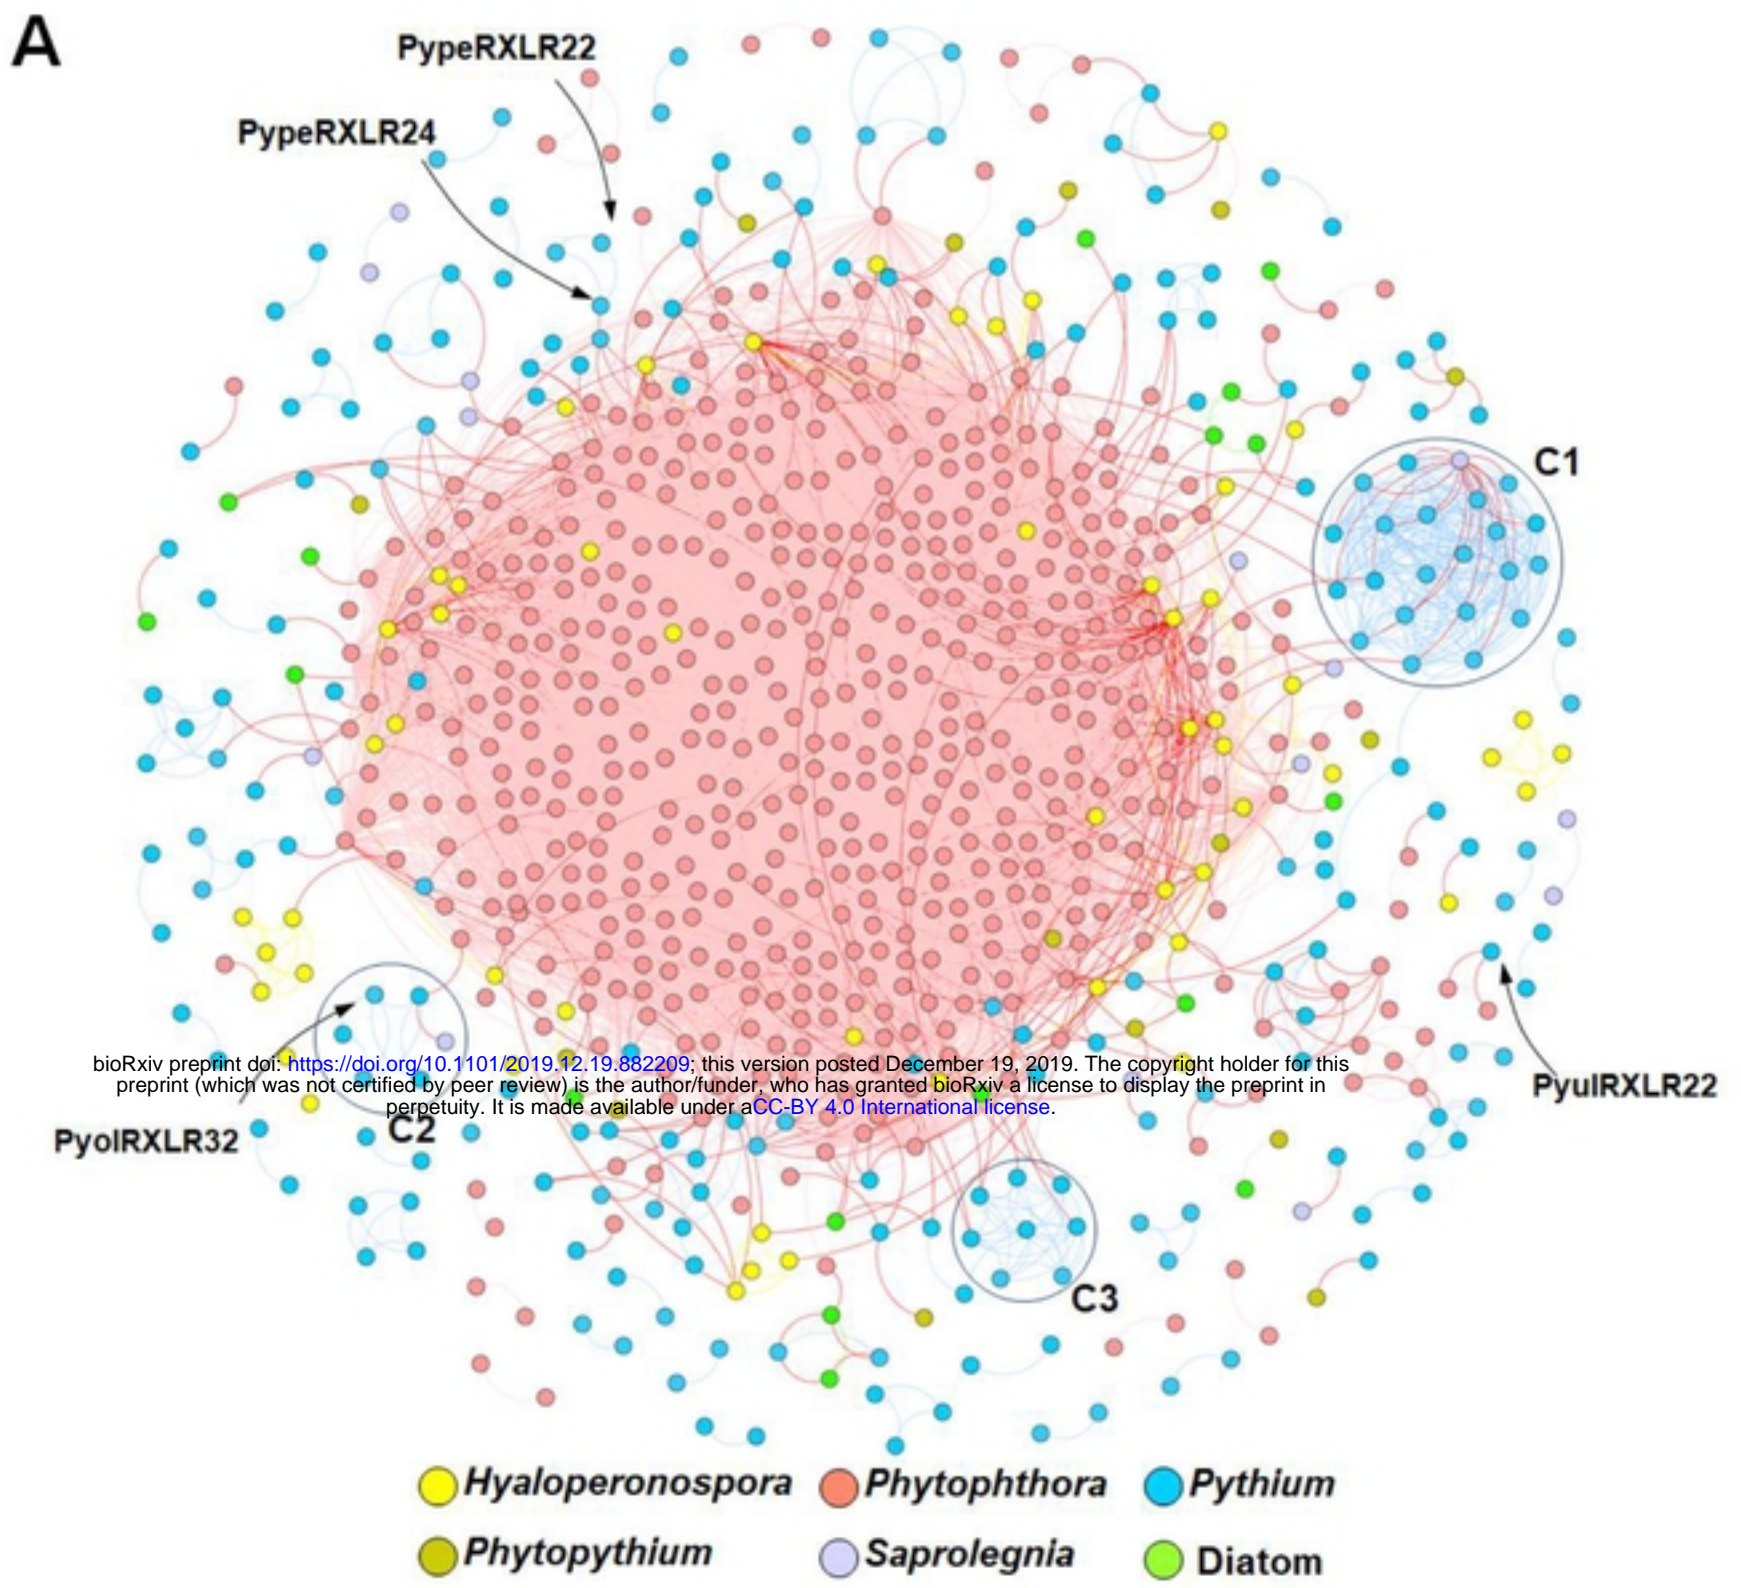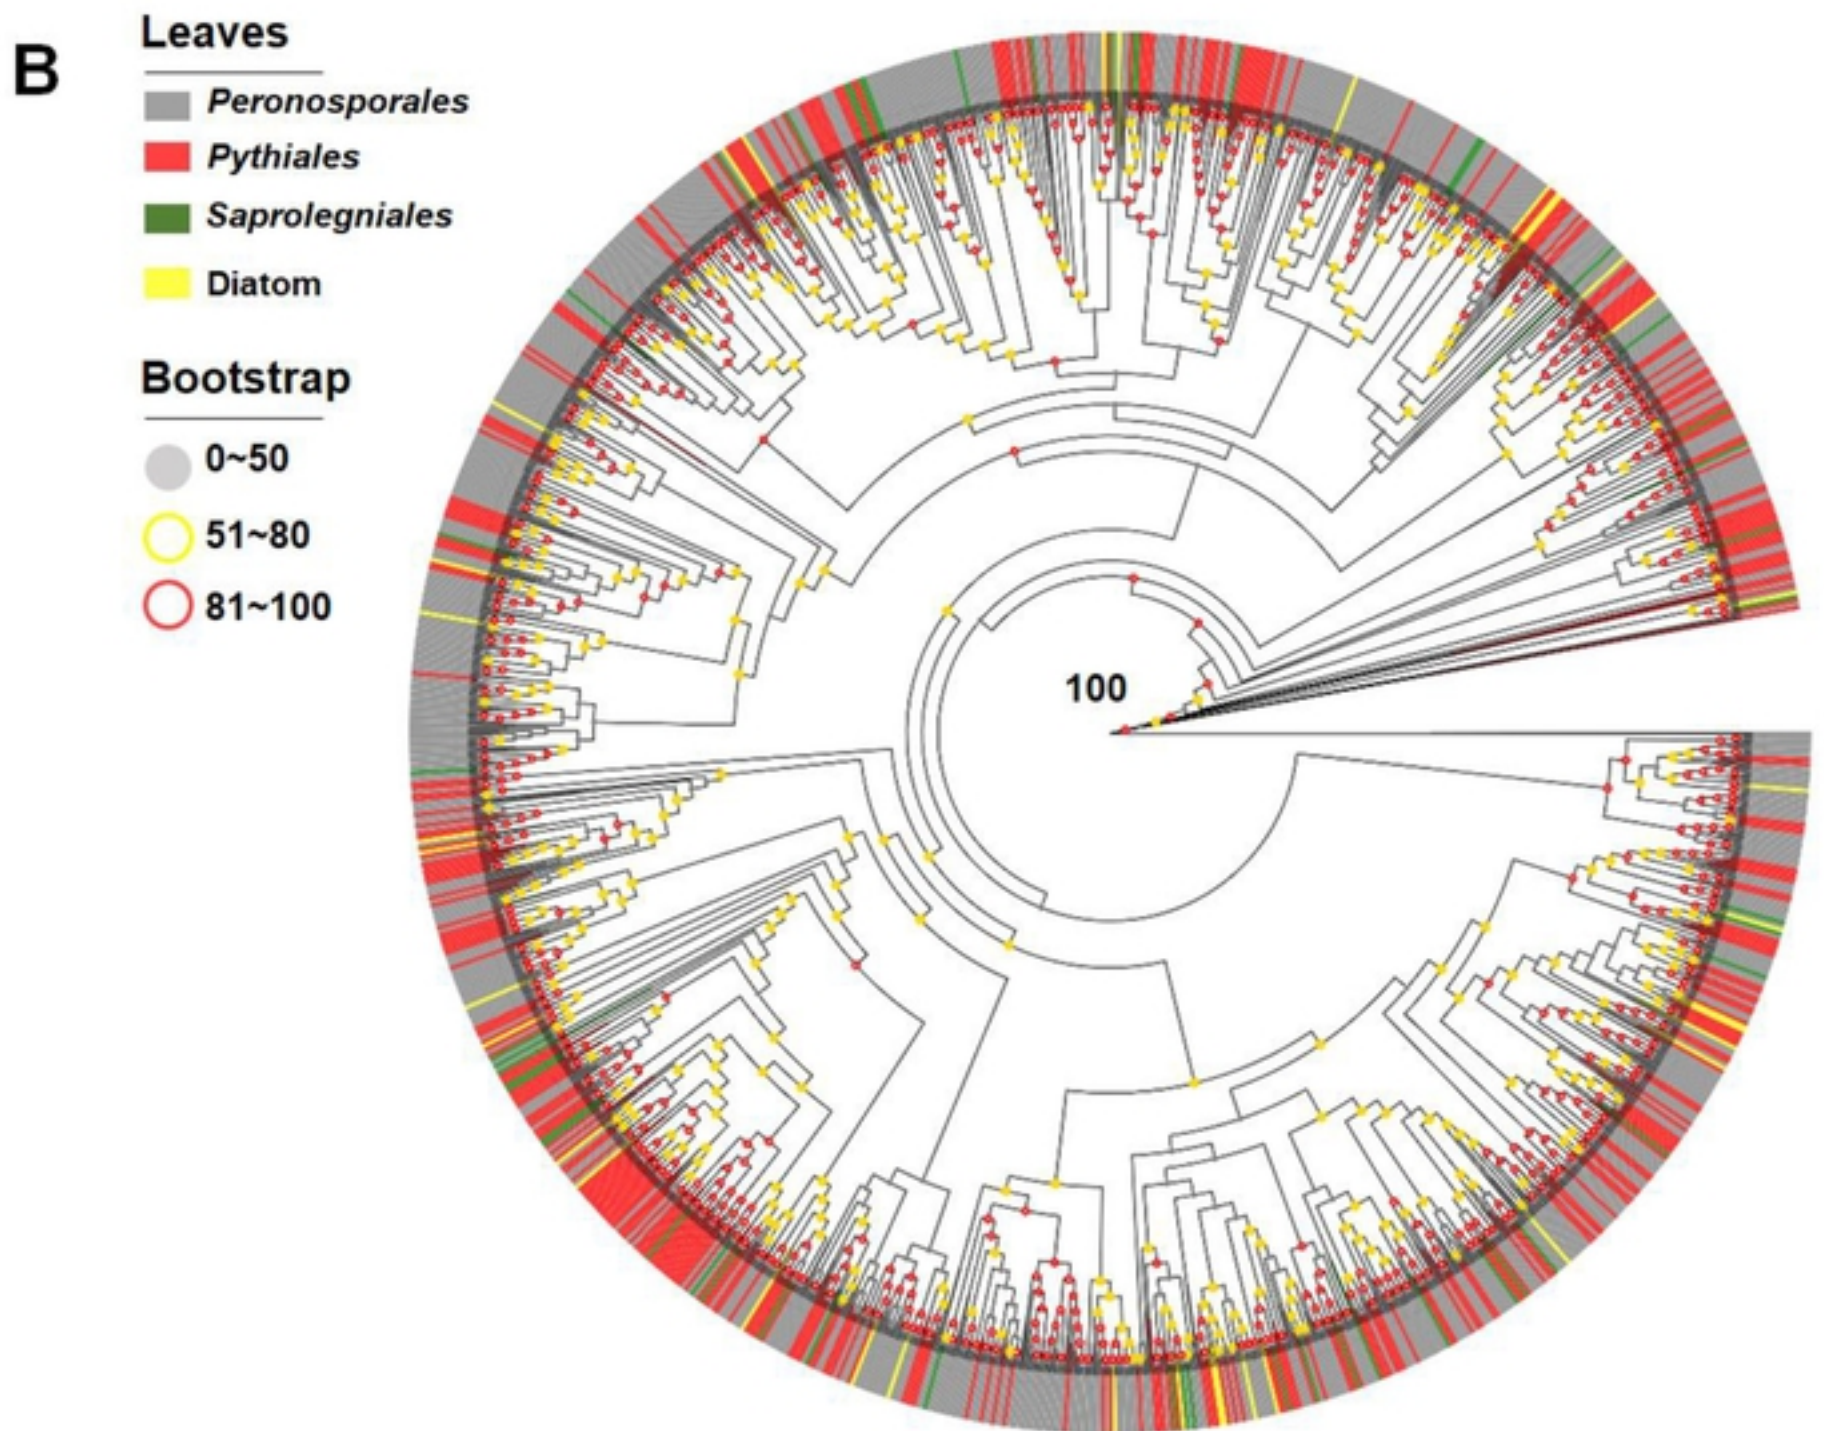

Figure2



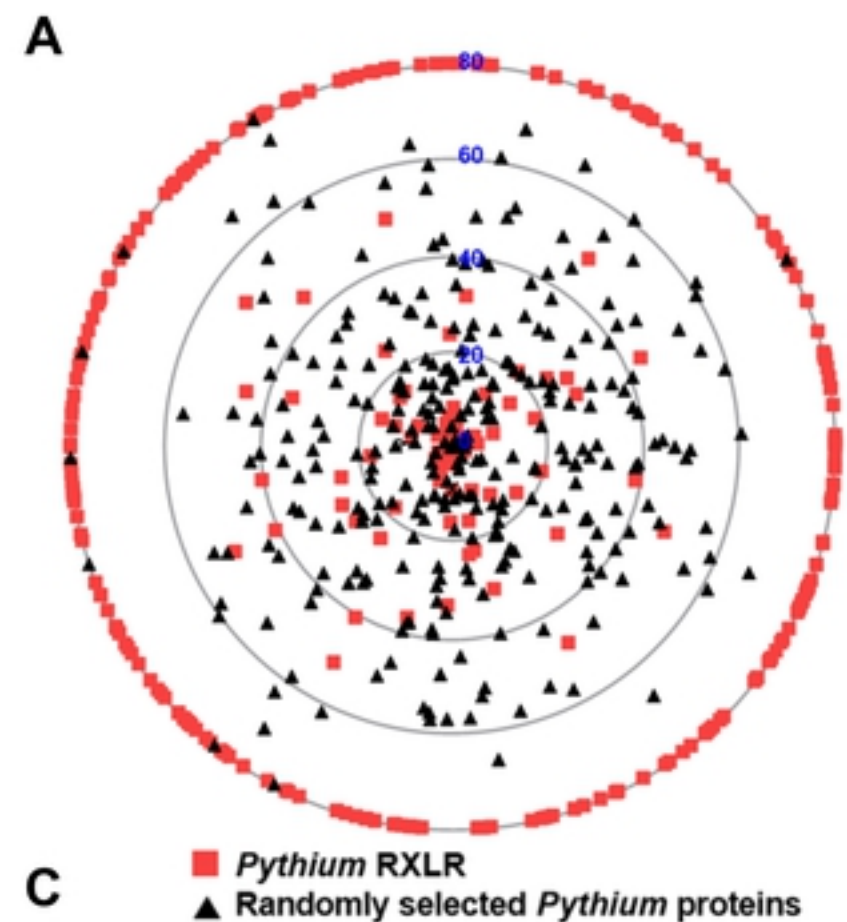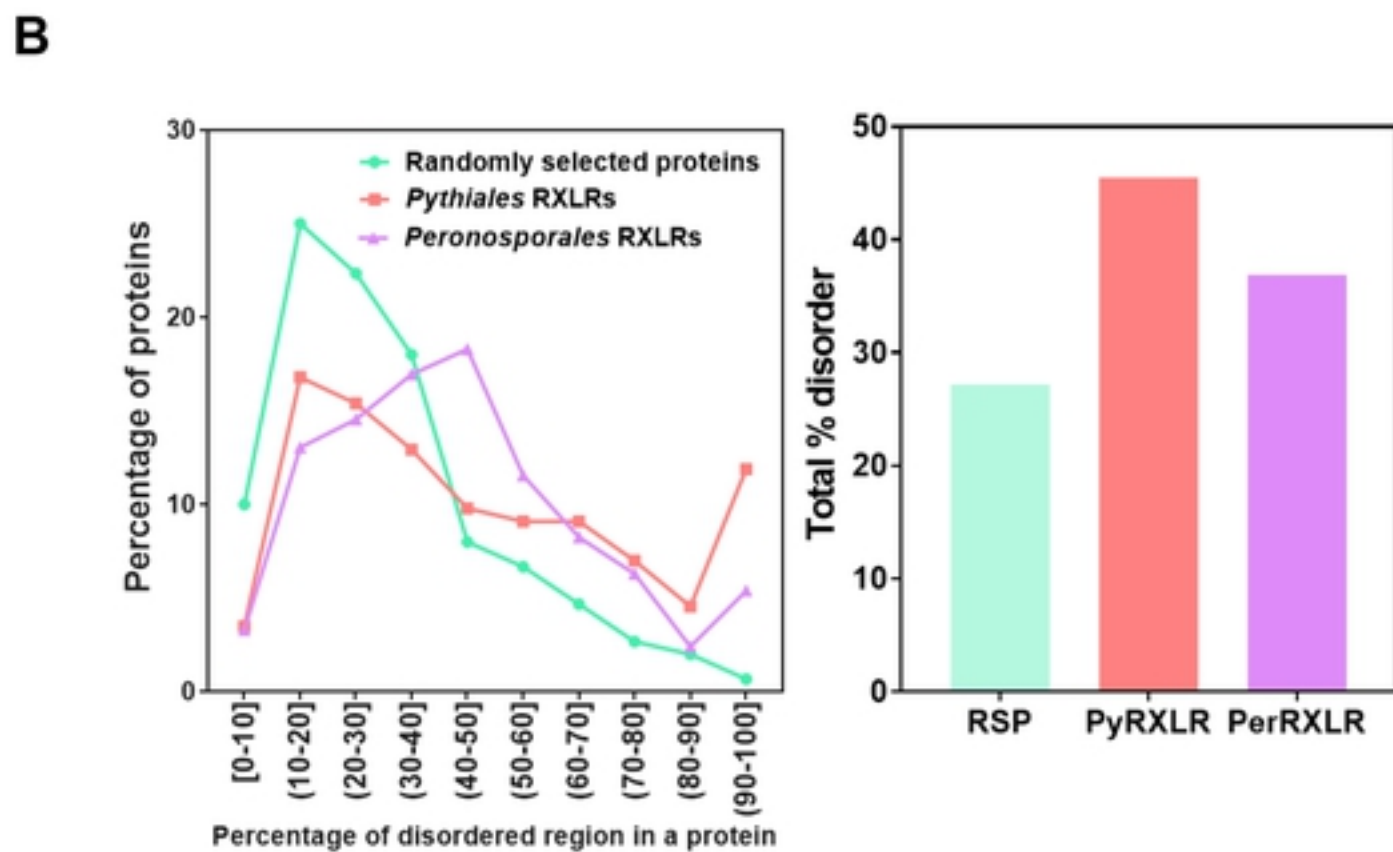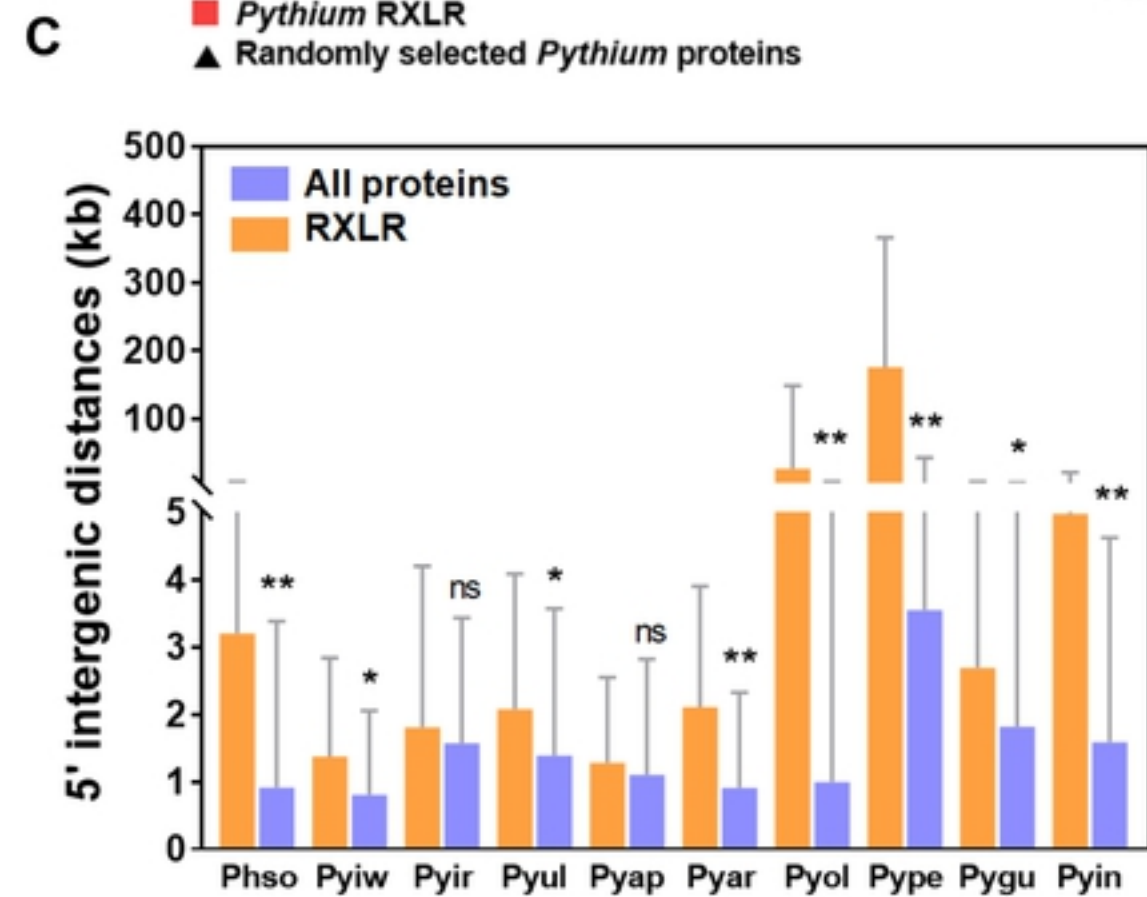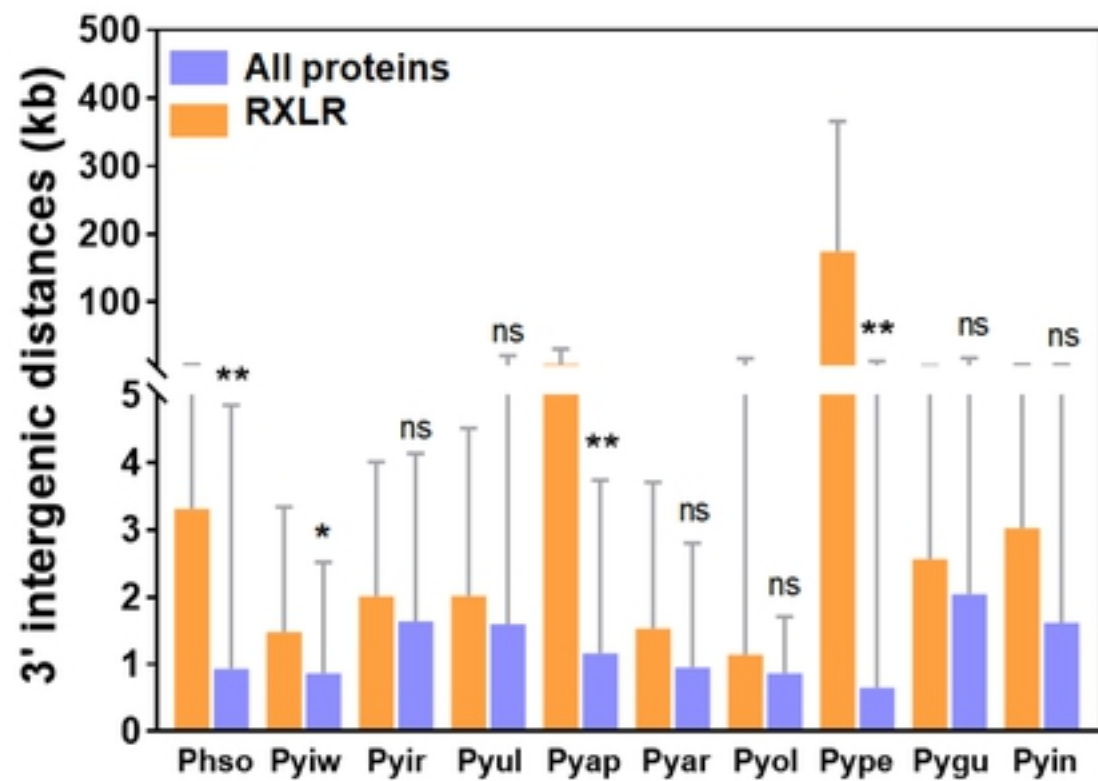

Figure3



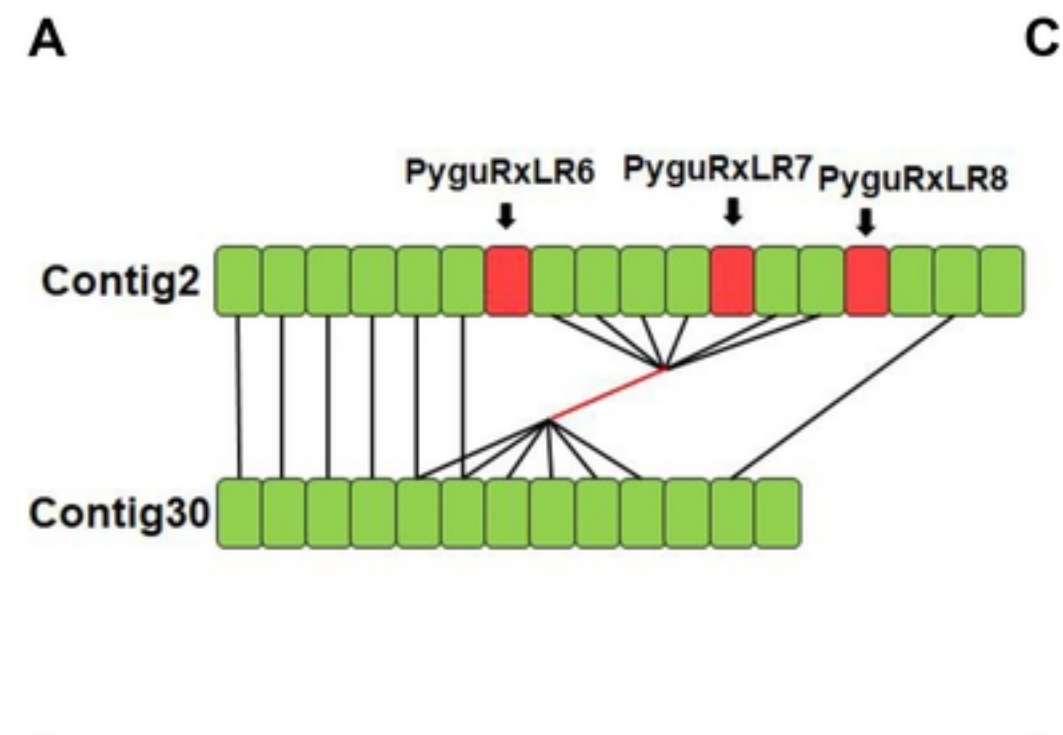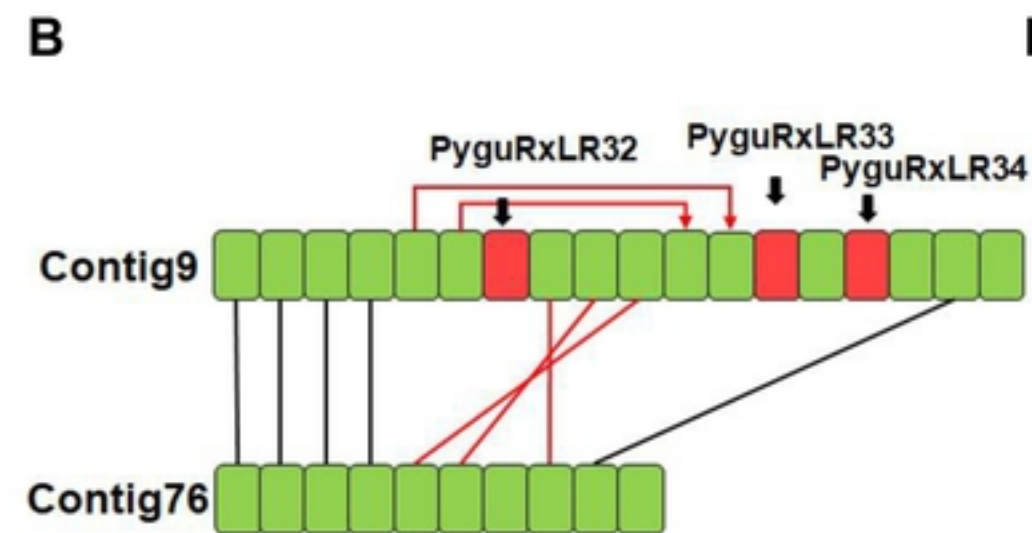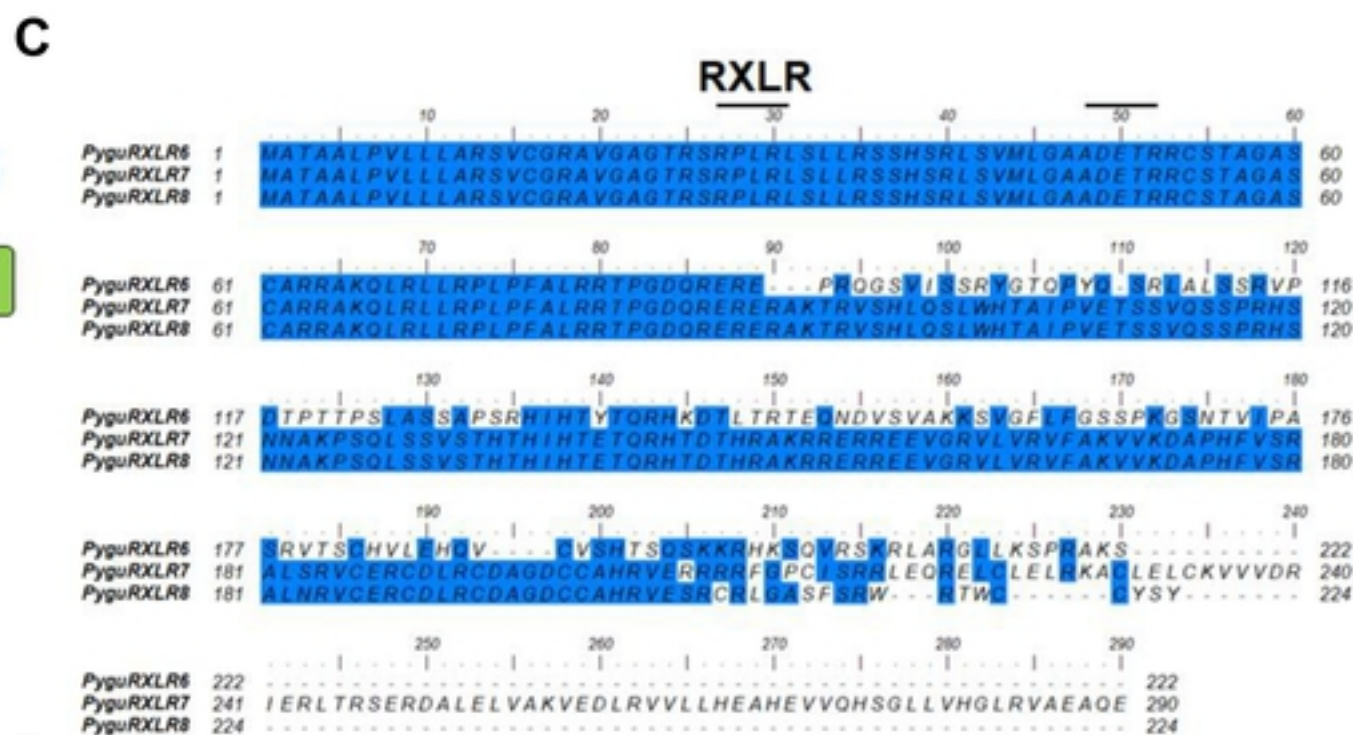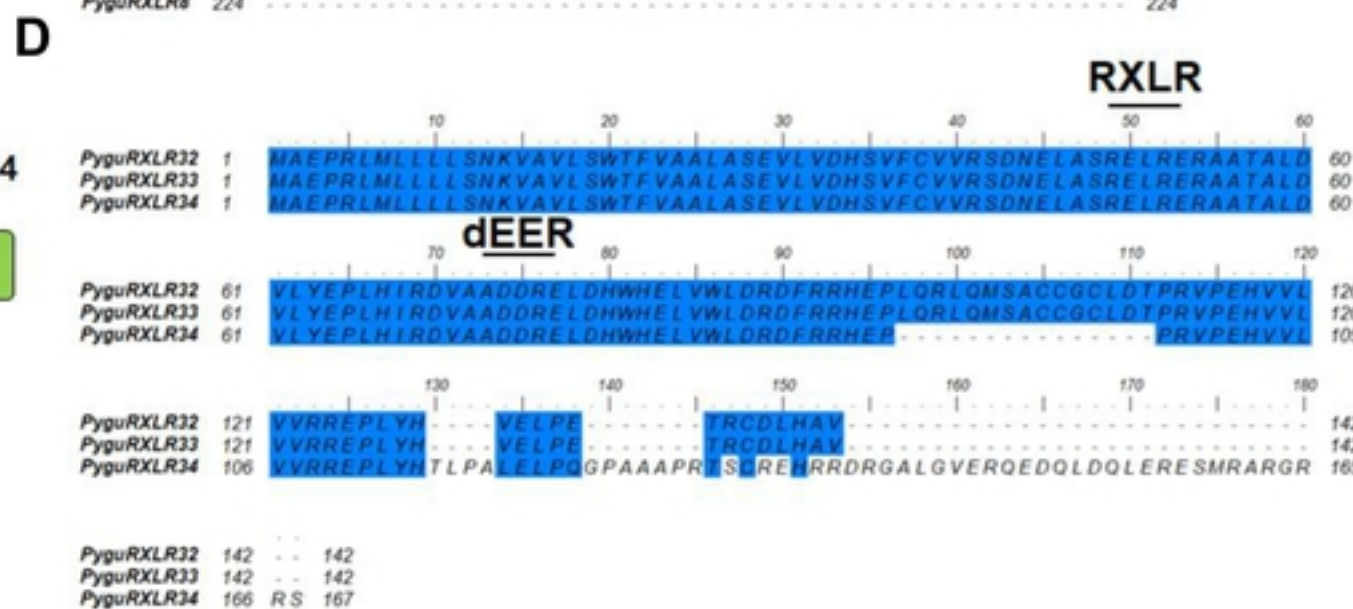

Figure4



A

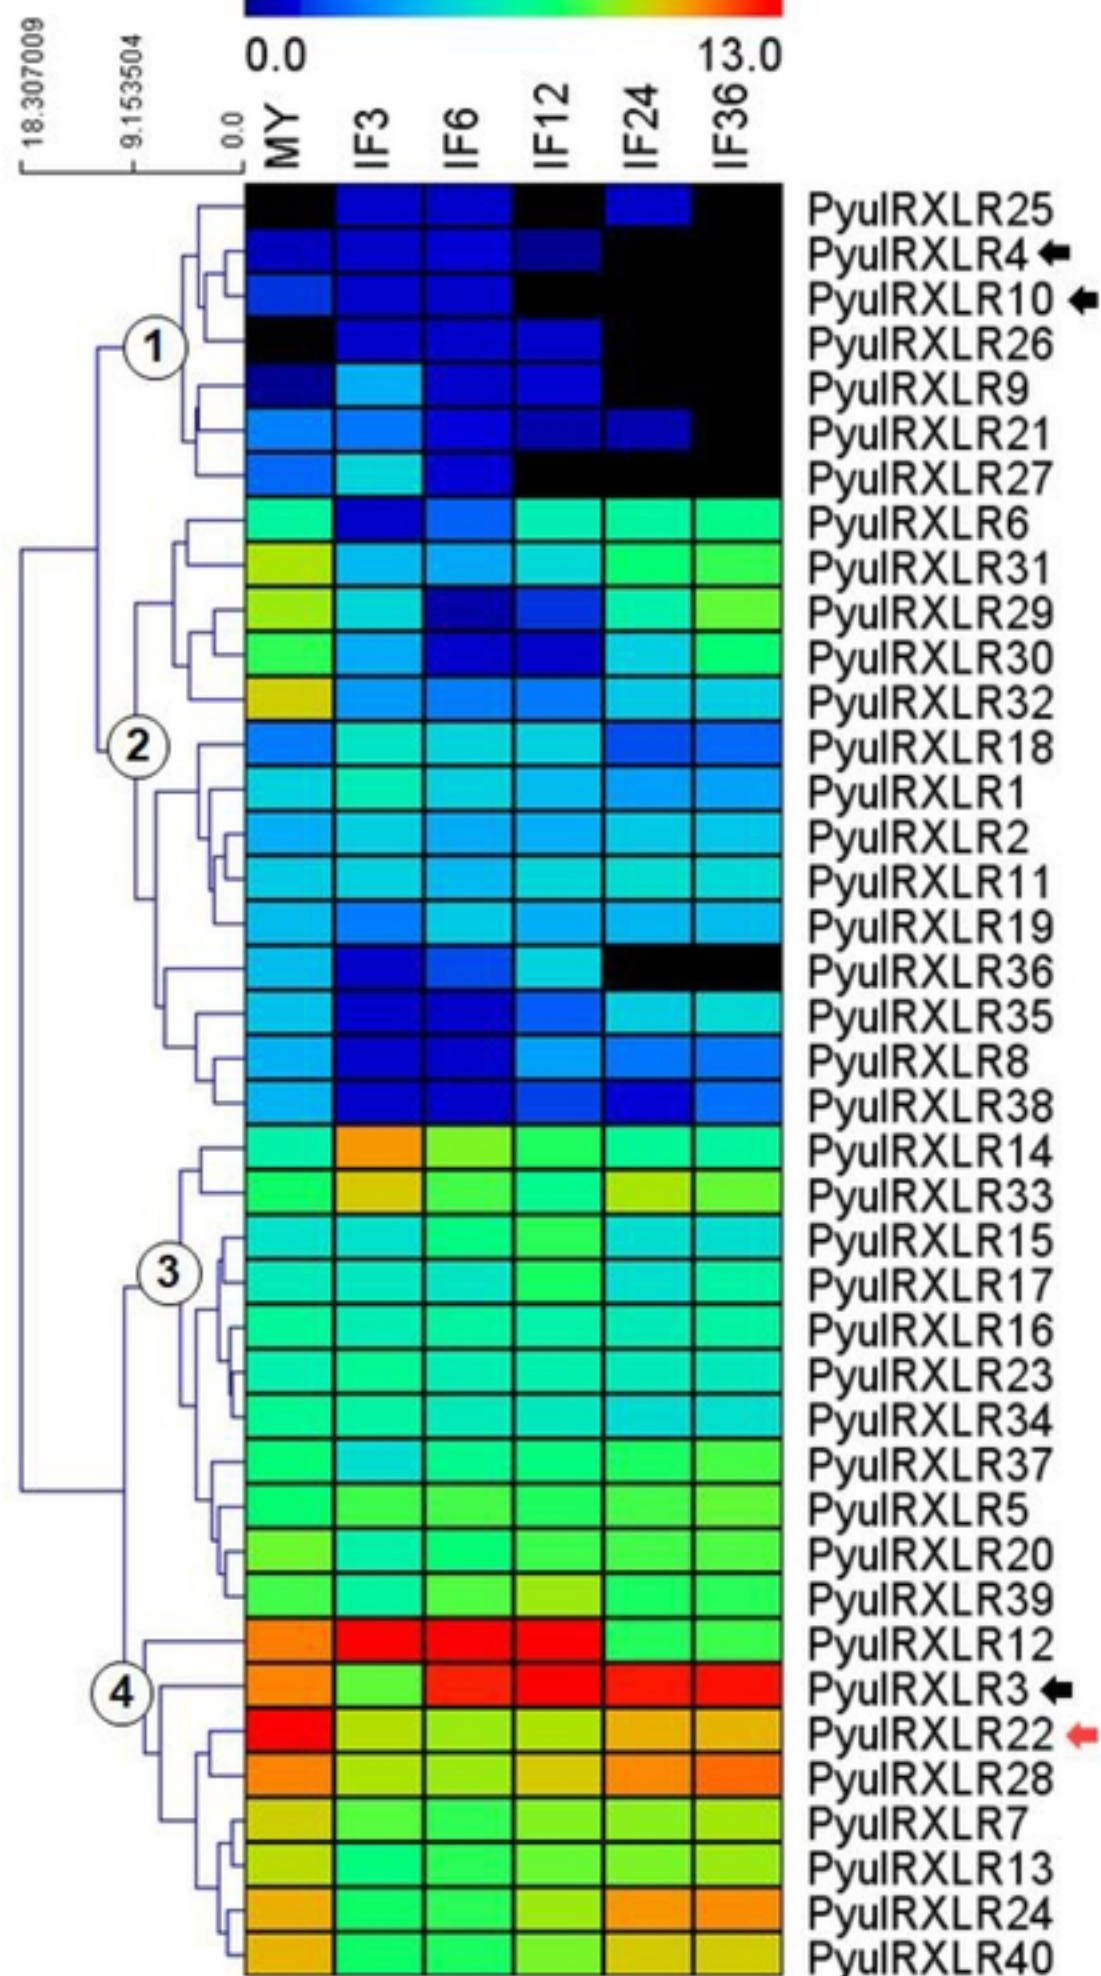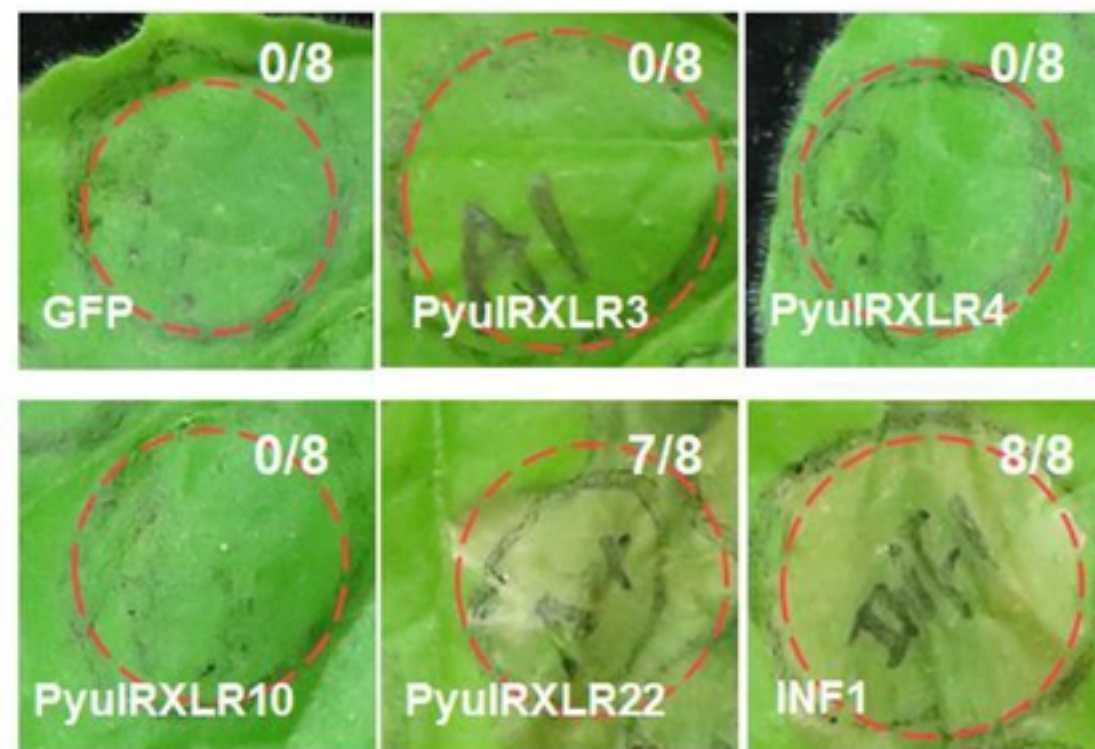

C

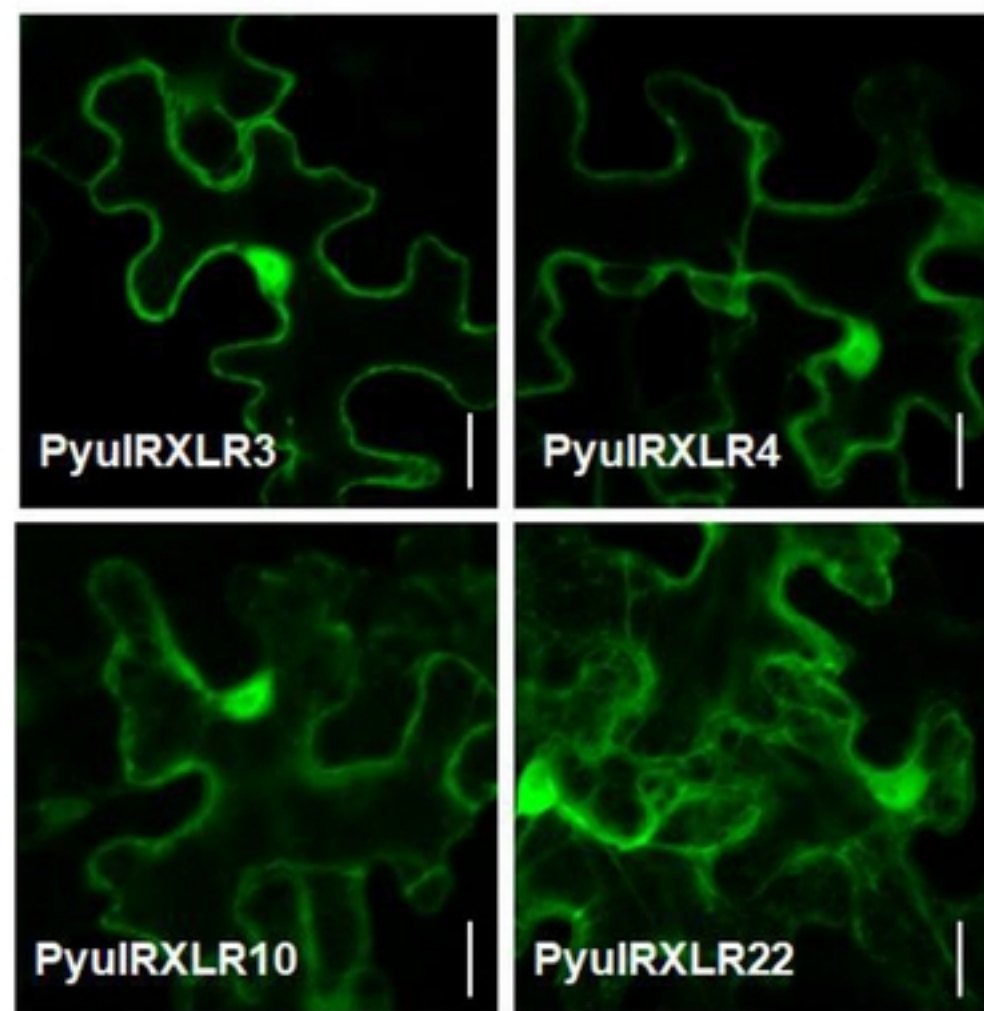

Figure 5



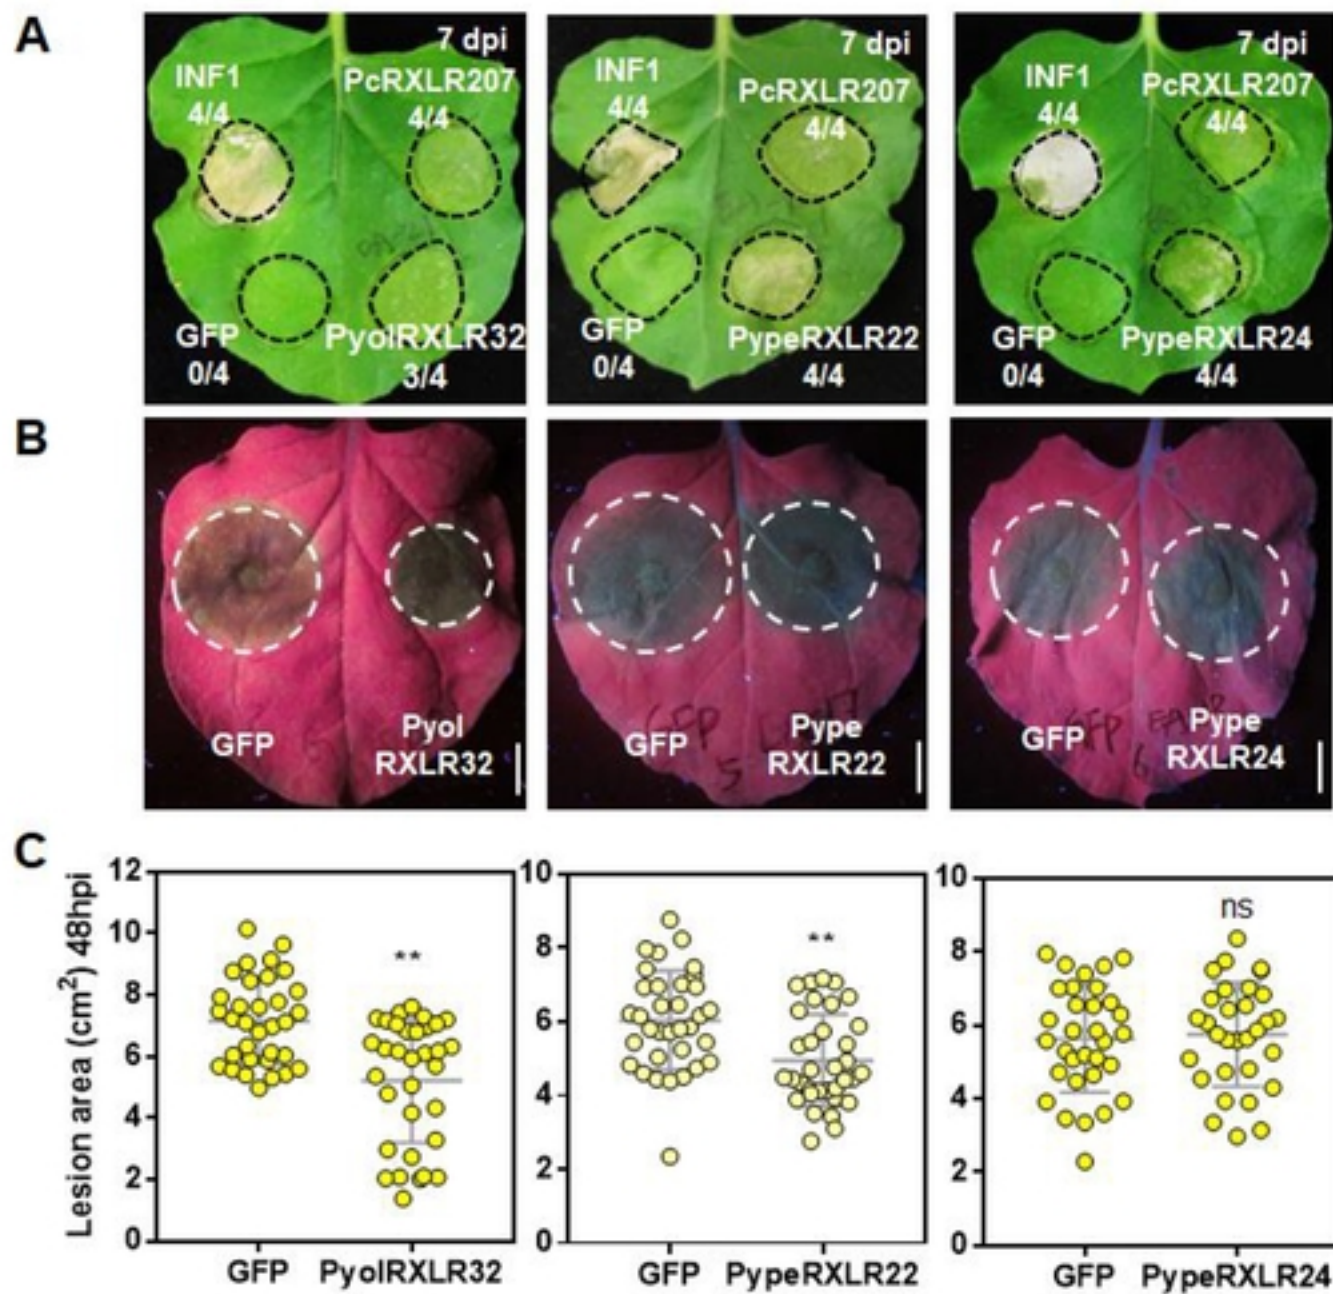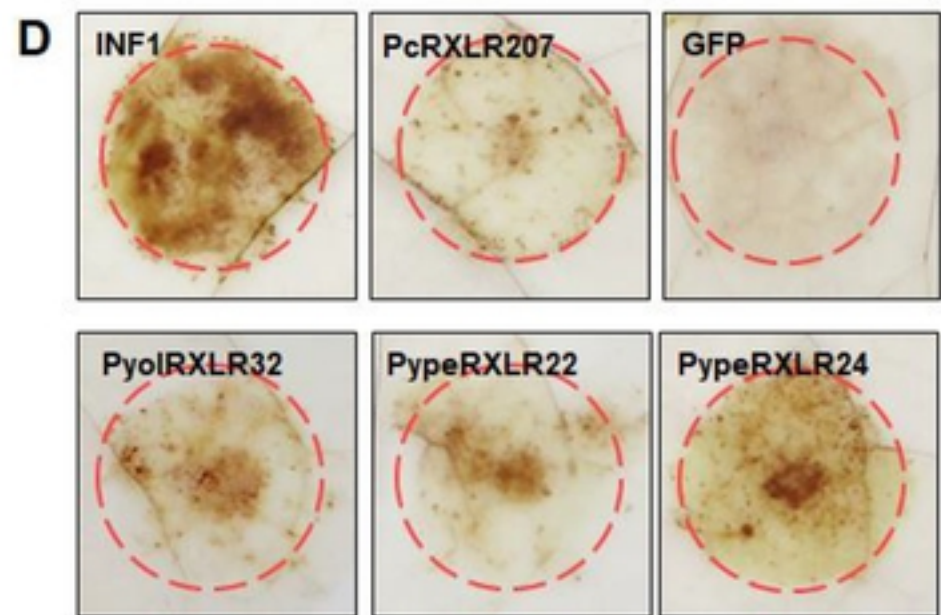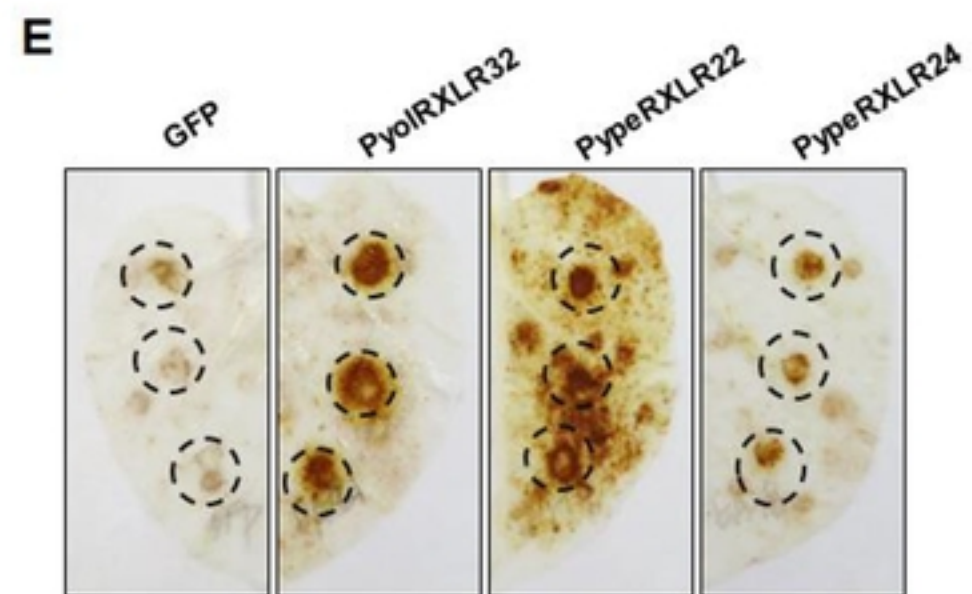

Figure6
